1           **Refactoring the upper sugar metabolism of *Pseudomonas putida* for co-utilization**  
2                                               **of disaccharides, pentoses, and hexoses**

3                                               **by**

4                                               Pavel Dvořák and Víctor de Lorenzo\*

5       *Systems and Synthetic Biology Program, Centro Nacional de Biotecnología CNB-CSIC,*

6       *Cantoblanco, 28049 Madrid, Spain.*

7       **Running title:** Engineering cellobiose and xylose metabolism in *P. putida*

8       **Keywords:** *Pseudomonas putida*; cellobiose; xylose; metabolism; *bglC*; *xylABE*; SEVA

9       vectors

11      \* Corresponding author:

Prof. V. de Lorenzo

Systems and Synthetic Biology Program

Centro Nacional de Biotecnología (CNB-CSIC)

Darwin 3, Campus de Cantoblanco

Madrid 28049, Spain

Phone: +34 91 585 4536

Fax: +34 91 585 4506

E-mail: vdlorenzo@cnb.csic.es

## 1 Abstract

2 Given its capacity to tolerate stress, NAD(P)H/ NAD(P) balance, and increased ATP levels,  
3 the platform strain *Pseudomonas putida* EM42, a genome-edited derivative of the soil  
4 bacterium *P. putida* KT2440, can efficiently host a suite of harsh reactions of biotechnological  
5 interest. Because of the lifestyle of the original isolate, however, the nutritional repertoire of *P.*  
6 *putida* EM42 is centered largely on organic acids, aromatic compounds and some hexoses  
7 (glucose and fructose). To enlarge the biochemical network of *P. putida* EM42 to include  
8 disaccharides and pentoses, we implanted heterologous genetic modules for D-cellobiose and  
9 D-xylose metabolism into the enzymatic complement of this strain. Cellobiose was actively  
10 transported into the cells through the ABC complex formed by native proteins PP1015-PP1018.  
11 The knocked-in  $\beta$ -glucosidase BglC from *Thermobifida fusca* catalyzed intracellular cleavage  
12 of the disaccharide to D-glucose, which was then channelled to the default central metabolism.  
13 Xylose oxidation to the dead end product D-xylonate was prevented by deleting the *gcd*  
14 gene that encodes the broad substrate range quinone-dependent glucose dehydrogenase.  
15 Intracellular intake was then engineered by expressing the *Escherichia coli* proton-coupled  
16 symporter XyleE. The sugar was further metabolized by the products of *E. coli* *xylA* (xylose  
17 isomerase) and *xylB* (xylulokinase) towards the pentose phosphate pathway. The resulting *P.*  
18 *putida* strain co-utilized xylose with glucose or cellobiose to complete depletion of the sugars.  
19 These results not only show the broadening of the metabolic capacity of a soil bacterium  
20 towards new substrates, but also promote *P. putida* EM42 as a platform for plug-in of new  
21 biochemical pathways for utilization and valorization of carbohydrate mixtures from  
22 lignocellulose processing.

23

24

## 1        **1. Introduction**

2        Due to the physicochemical stresses that prevail in the niches in which the soil bacterium  
3        *Pseudomonas putida* thrives (it is typically abundant in sites contaminated by industrial  
4        pollutants), this microorganism is endowed with a large number of traits desirable in hosts of  
5        harsh biotransformations of industrial interest (Nikel et al., 2014). The *P. putida* strain KT2440  
6        is a saprophytic, non-pathogenic, GRAS-certified (Generally Recognized as Safe) bacterium;  
7        as the most thoroughly characterized laboratory pseudomonad, it has an expanding catalogue  
8        of available systems and synthetic biology tools (Aparicio et al., 2017; Elmore et al., 2017;  
9        Martínez-García and de Lorenzo, 2017, p.; Nogales et al., 2017). This bacterium is becoming  
10       a laboratory workhorse as well as a valued cell factory (Benedetti et al., 2016; Loeschcke and  
11       Thies, 2015; Nikel and de Lorenzo, 2013; Poblete-Castro et al., 2012). Its high resistance to  
12       endogenous and exogenous insults makes it tolerant to industrially relevant chemicals (*e.g.*,  
13       ethanol, *p*-coumaric acid, toluene) and to by-products of biomass hydrolysis (furfural, 5-  
14       (hydroxymethyl)furfural, benzoate, acetic acid) at concentrations that are inhibitory to other  
15       microbial platforms, including *Escherichia coli* (Calero et al., 2017; Guarnieri et al., 2017;  
16       Johnson and Beckham, 2015; Nikel and de Lorenzo, 2014). The nutritional landscape of typical  
17       *P. putida* niches (plant rhizosphere, polluted soil) has pushed its metabolic specialization  
18       towards aromatic compounds (Jiménez et al., 2002) and organic acids (Dos Santos et al., 2004).  
19       The very few carbohydrates on which *P. putida* KT2440 can grow are confined to some  
20       hexoses (glucose and fructose), with an inability to metabolize disaccharides or 5-carbon sugars  
21       productively (Nogales et al., 2017; Puchałka et al., 2008; Rojo, 2010). This limits the options  
22       for its use as a platform to process the carbohydrate products of cellulosic and lignocellulosic  
23       waste.

1 Lignocellulose can be decomposed to cellulose (25-55%), hemicellulose (11-50%), and  
2 lignin (10-40%), all of which can be further hydrolyzed enzymatically to shorter carbohydrate  
3 polymers and oligomers, monomeric sugars, and lignin-derived aromatics (Mosier et al., 2005).  
4 When standard commercial cellulosic cocktails are applied, D-glucose and D-xylose are two  
5 major monomeric products of pretreated plant biomass hydrolysi (Taha et al., 2016). A number  
6 of microorganisms have been engineered to use these sugars as substrates for the  
7 biomanufacturing of value-added chemicals (Kawaguchi et al., 2016). Cellodextrins, including  
8 D-cellobiose, are the most abundant by-products of cellulose saccharification and predominate  
9 following partial hydrolysis (Chen, 2015; Singhanian et al., 2013). Well defined, industrially  
10 relevant microbes with efficient cellobiose metabolism are thus very desirable (Kawaguchi et  
11 al., 2016; Parisutham et al., 2017; Taha et al., 2016). Both cellobiose and xylose metabolism  
12 have been established artificially in a number of microorganisms (Ha et al., 2011; Lane et al.,  
13 2015; Le Meur et al., 2012; Lee et al., 2016; Meijnen et al., 2008; Shin et al., 2014; Vinuselvi  
14 and Lee, 2011) and some *Pseudomonas* species can use xylose as a C source (Liu et al., 2015).  
15 Nonetheless, the native capacity of *P. putida* KT2440 to host transformations of lignin-derived  
16 aromatics (Linger et al., 2014) has not been combined with co-consumption of these major  
17 lignocellulose-derived sugars.

18 Here we sought to engineer *P. putida* for efficient growth on cellobiose and to test its  
19 ability to co-metabolize this disaccharide with xylose. We combined a metabolic engineering  
20 approach (**Fig. 1**) with the *P. putida* KT2440-derived strain *P. putida* EM42 (Martínez-García  
21 et al., 2014b). This strain has a streamlined genome (300 genes, ~4.3 % of the genome deleted)  
22 that results in improved physiological properties compared to *P. putida* KT2440 including  
23 lower sensitivity to oxidative stress, increased growth rates, and enhanced expression of  
24 heterologous genes (Lieder et al., 2015; Martínez-García et al., 2014b). We show below that

1 recruitment of one heterologous  $\beta$ -glucosidase for intracellular cellobiose hydrolysis, and the  
2 implementation of three enterobacterial genes (xylose transporter, isomerase and kinase)  
3 sufficed to cause disaccharide and the pentose co-utilization by *P. putida* EM42 with  
4 inactivated glucose dehydrogenase while maintaining its ability to use glucose. We also  
5 demonstrate that *P. putida* metabolism generates more ATP when cells are grown on cellobiose  
6 instead of glucose. This study expands the catalytic scope of *P. putida* towards utilization of  
7 major components of all three lignocellulose-derived fractions. Moreover, given that the  
8 cellobiose, as the bulk by-product of standard cellulose saccharification, frequently remains  
9 untouched in the sugar mix (due to the inability of most microorganisms to assimilate it), our  
10 results demonstrate rational tailoring of an industrially relevant microbial host to achieve a  
11 specific step in such a biotechnological value chain.

12

13

14

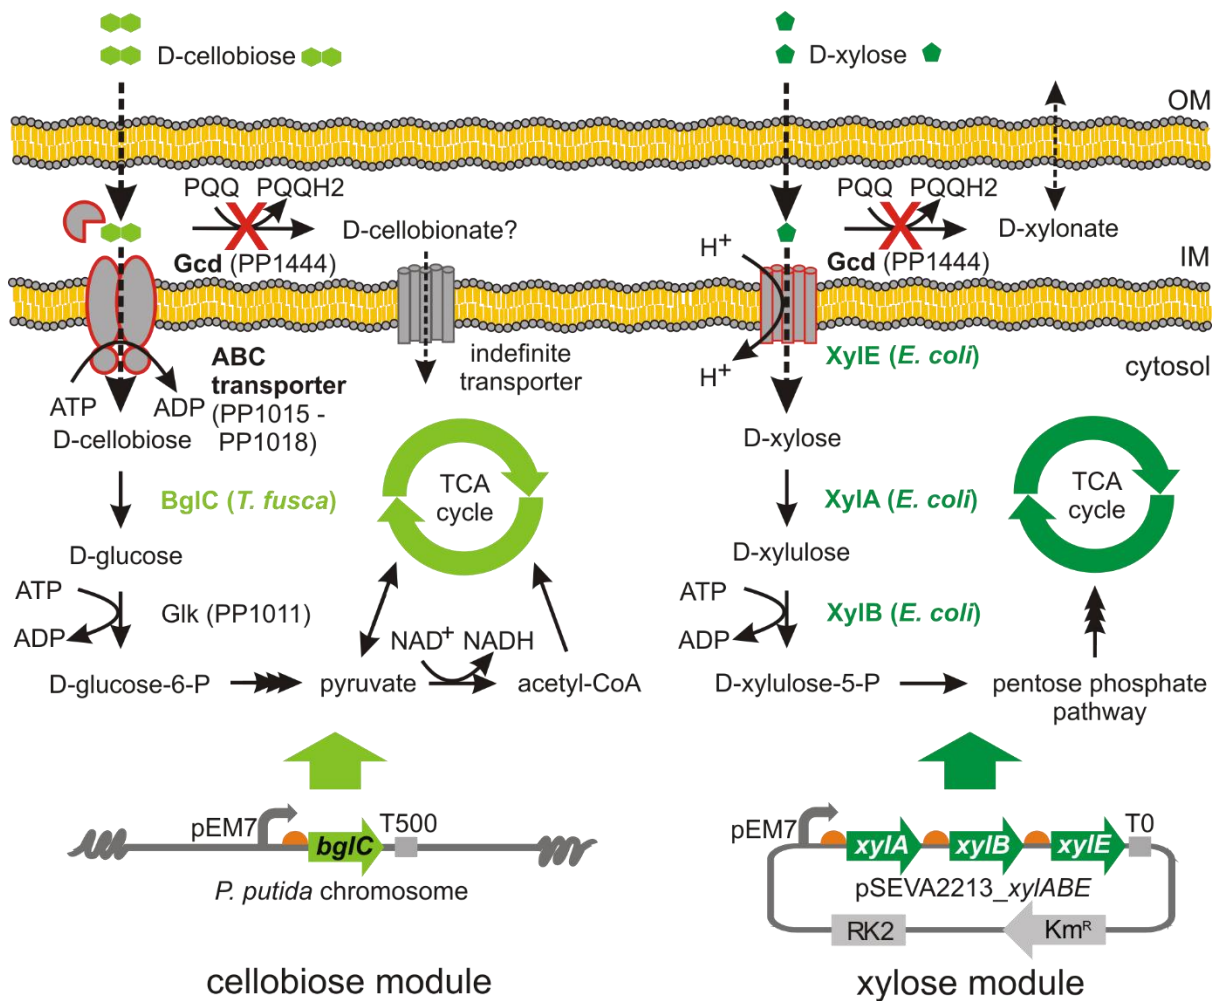

1

cellobiose module

xylose module

2 **Figure 1.** Engineering *Pseudomonas putida* EM42 for co-utilization of D-cellobiose and D-  
 3 xylose. Cellobiose metabolism in *P. putida* was established by implantating the  $\beta$ -glucosidase  
 4 BglC from *Thermobifida fusca*. Experiments suggested that cellobiose enters *P. putida* cells  
 5 through the same pathways as glucose, (i) the ATP-dependent ABC transporter, and (ii) the  
 6 peripheral oxidative route, which starts with periplasmic conversion of cellobiose to putative  
 7 intermediate D-cellobionate through the action of the membrane-bound glucose dehydrogenase  
 8 Gcd. Xylose metabolism in *P. putida* was established by implantating of xylose isomerase  
 9 XylA, xylulokinase XylB, and xylose-proton symporter XylE from *E. coli*. For the purpose of  
 10 cellobiose and xylose co-utilization, an expression cassette with the *bglC* gene was inserted  
 11 into the chromosome of *P. putida* EM42  $\Delta gcd$ , while the synthetic *xylABE* operon was  
 12 expressed from the low copy pSEVA2213 plasmid under the constitutive pEM7 promoter. The  
 13 EM42  $\Delta gcd$  mutant was used to avoid xylose conversion by glucose dehydrogenase to dead-  
 14 end product D-xylonate. PQQ, pyrroloquinoline quinone; Glk, glucokinase; TCA cycle,  
 15 tricarboxylic acid cycle; OM, (outer membrane); IM (inner membrane).

16

17

18

## 1        2. Materials and methods

### 2        2.1. Bacterial strains, plasmids, and growth conditions

3        All bacterial strains and plasmids used in this study are listed in **Table 1**. *Escherichia coli*  
4        strains used for cloning or triparental mating were routinely grown in lysogeny broth (LB; 10  
5        g L<sup>-1</sup> tryptone, 5 g L<sup>-1</sup> yeast extract, 5 g L<sup>-1</sup> NaCl) with agitation (170 rpm) at 37°C.  
6        Chloramphenicol (Cm, 30 µg mL<sup>-1</sup>) was supplemented to the medium with *E. coli* helper strain  
7        HB101. *Pseudomonas putida* recombinants were routinely pre-cultured overnight in 2.5 mL of  
8        LB medium with agitation of 300 rpm (Heidolph Unimax 1010 and Heidolph Incubator 1000;  
9        Heidolph Instruments, Germany) at 30°C. For initial tests of expression of heterologous genes  
10       in *P. putida*, cells were transferred to 25 mL of fresh LB medium in Erlenmeyer flask and  
11       cultivated as described in section 2.4. For the growth experiments with different carbohydrates,  
12       overnight culture was spun by centrifugation (4,000 g, RT, 5 min), washed with M9 minimal  
13       medium (per 1 L: 4.25 g Na<sub>2</sub>HPO<sub>4</sub> 2H<sub>2</sub>O, 1.5 g KH<sub>2</sub>PO<sub>4</sub>, 0.25 g NaCl, 0.5 g NH<sub>4</sub>Cl) added  
14       with MgSO<sub>4</sub> to the final concentration of 2 mM, and with 2.5 mL L<sup>-1</sup> trace element solution  
15       (Abril et al., 1989). Thiamine HCl (1 mM) was added to the minimal medium for cultures with  
16       *E. coli* recombinants. Cells were resuspended to OD<sub>600</sub> of 0.1 in 25 mL of the same medium  
17       with kanamycin (Km, 50 µg mL<sup>-1</sup>), in case of recombinants with pSEVA2213 or pSEVA238  
18       plasmid, or streptomycin (Sm, 60 µg mL<sup>-1</sup>), in case of *P. putida* EM42 Δ*gcd bglC*, and with  
19       carbon source (glucose, xylose, or cellobiose) of concentration defined in the text or respective  
20       figure caption. All used solid media (LB and M9) contained 15 g L<sup>-1</sup> agar. M9 solid media were  
21       prepared with 2 mM MgSO<sub>4</sub>, 2.5 mL L<sup>-1</sup> trace element solution (Abril et al., 1989) and 0.2 %  
22       (w/v) citrate, 0.4 % xylose, or 0.4 % cellobiose used as a sole carbon source.

23

24

## 1        2.2. Plasmid and strain constructions

2        DNA was manipulated using standard laboratory protocols (Sambrook and Russell, 2001).  
3        Genomic DNA was isolated using GenElute bacterial genomic DNA kit (Sigma-Aldrich,  
4        USA). Plasmid DNA was isolated with QIAprep Spin Miniprep kit (Qiagen, USA). The  
5        oligonucleotide primers used in this study (**Table S1**) were purchased from Sigma-Aldrich  
6        (USA). The genes of interest were amplified by polymerase chain reaction (PCR) using Q5  
7        high fidelity DNA polymerase (New England BioLabs, USA) according to the manufacturer's  
8        protocol. The reaction mixture (50  $\mu$ L) further contained polymerase HF or GC buffer (New  
9        England BioLabs, USA), dNTPs mix (0.2 mM each; Roche, Switzerland), respective primers  
10       (0.5 mM each), water, template DNA, and DMSO. GC buffer and DMSO were used for  
11       amplification of genes from *P. putida*. PCR products were purified with NucleoSpin Gel and  
12       PCR Clean-up (Macherey-Nagel, Germany). DNA concentration was measured with NanoVue  
13       spectrophotometer (GE Healthcare, USA). Colony PCR was performed using 2x PCR Master  
14       Mix solution of Taq DNA polymerase, dNTPs and reaction buffer (Promega, USA). All used  
15       restriction enzymes were from New England BioLabs (USA). Digested DNA fragments were  
16       ligated using Quick Ligation kit (New England BioLabs, USA). PCR products and digested  
17       plasmids separated by DNA electrophoresis with 0.8 % (w/v) agarose gels were visualised  
18       using Molecular Imager VersaDoc (Bio-Rad, USA). Plasmid constructs were confirmed by  
19       DNA sequencing (Macrogen, South Korea). Chemocompetent *E. coli* Dh5 $\alpha$  cells were  
20       transformed with ligation mixtures or complete plasmids and individual clones selected on LB  
21       agar plates with Km (50  $\mu$ g mL<sup>-1</sup>) were used for preparation of glycerol (20 % w/v) stocks.  
22       Constructed plasmids were transferred from *E. coli* Dh5 $\alpha$  donor to *P. putida* EM42 by tripartite  
23       mating, using *E. coli* HB101 helper strain with pRK600 plasmid (**Table1**). Alternatively,  
24       electroporation (2.5 kV, 4 – 5 ms pulse) was used for transformation of *P. putida* cells with



1 selected plasmids using a MicroPulser electroporator and Gene Pulser Cuvettes with 0.2 cm  
2 gap (Bio-Rad, USA). Preparation of *P. putida* electrocompetent cells and electroporation  
3 procedure was performed as described elsewhere (Aparicio et al., 2015). *P. putida*  
4 transconjugants or transformants were selected on M9 agar plates with citrate or LB agar plates,  
5 respectively, with Km (50  $\mu\text{g mL}^{-1}$ ) at 30°C overnight.

6 *Construction of cellobiose metabolism module.* The *ccel\_2454* gene encoding  $\beta$ -  
7 glucosidase (EC 3.2.1.21) from *Clostridium cellulolyticum* was synthesized together with  
8 consensus ribosome binding site (RBS; GeneArt/Thermo Fisher Scientific, Germany) and  
9 subcloned from delivery vector pMA\_*ccel2454* into pSEVA238 upon digestion with *KpnI* and  
10 *PstI* resulting in pSEVA238\_*ccel2454*. The  $\beta$ -glucosidase encoding *bglX* gene was PCR  
11 amplified from the genomic DNA of *P. putida* KT2440 using *bglX* fw and *bglX* rv primers,  
12 digested with *NdeI* and *HindIII* and cloned into corresponding restriction sites of modified  
13 pSEVA238 resulting in pSEVA238\_*bglX*. The *NdeI* site and a consensus RBS were previously  
14 introduced into the standard SEVA polylinker of pSEVA238 (unpublished plasmid). The *bglC*  
15 gene encoding  $\beta$ -glucosidase from *Thermobifida fusca* with N-terminal 6xHis tag was  
16 subcloned from pET21a\_*bglC* construct into *NdeI* and *HindIII* restriction sites of modified  
17 pSEVA238. The *bglC* gene with the RBS and His tag was subsequently PCR amplified using  
18 primers *bglC* fw and *bglC* rv, the PCR product was cut with *SacI* and *PstI* and subcloned into  
19 pSEVA2213 giving rise to pSEVA2213\_*bglC*.

20 *Insertion of bglC gene into P. putida chromosome.* The *bglC* gene with consensus RBS was  
21 subcloned into *SacI* and *PstI* sites of mini-Tn5-vector pBAMD1-4 (Martínez-García et al.,  
22 2014a). Original pBAMD1-4 plasmid was endowed with pEM7 promoter subcloned into *AvrII*  
23 and *EcoRI* sites. *P. putida* EM42  $\Delta\text{gcd}$  cells (100  $\mu\text{L}$ ) were electroporated with plasmid DNA  
24 (200 ng) and recovered for 7 h in 5 mL of modified Terrific Broth (TB) medium (yeast extract

1 24 g L<sup>-1</sup>, tryptone 20 g L<sup>-1</sup>, KH<sub>2</sub>PO<sub>4</sub> 0.017 M, K<sub>2</sub>HPO<sub>4</sub> 0.072 M) at 30°C with shaking (170  
2 rpm). Cells were collected by centrifugation (4000 rpm, 10 min) and resuspended in 100 mL  
3 of selection M9 medium with 5 g L<sup>-1</sup> cellobiose and streptomycin (50 µg mL<sup>-1</sup>). After four days  
4 of incubation at 30°C with shaking (170 rpm), cells were spun (4000 rpm, 15 min) and plated  
5 on selection M9 agar plates with 5 g L<sup>-1</sup> cellobiose and streptomycin (50 µg mL<sup>-1</sup>). Three fastest  
6 growing clones were re-streaked on fresh M9 agar plates with streptomycin or with  
7 streptomycin (50 µg mL<sup>-1</sup>) and ampicillin (500 µg mL<sup>-1</sup>) to rule out insertion of the whole  
8 pBAMD1-4 plasmid. The growth of three candidates in liquid minimal medium with cellobiose  
9 was verified. The insertion site of expression cassette (pEM7 promoter, *bglC* gene, T500  
10 transcriptional terminator, and *aadA* gene) in chromosome of the fastest growing clone was  
11 determined by two-round arbitrary primed PCR with Arb6, Arb2, ME-O-Sm-Ext-F, and ME-  
12 O-Sm-Int-F primers (**Table S1**) following the protocol described before (Martínez-García et  
13 al., 2014a). Me-O-Sm-Int-F was used as a sequencing primer for PCR product. Position of  
14 *bglC* expression cassette in *P. putida* chromosome was reversly verified by colony PCR with  
15 *bglC* check fw and *xerD* check rv primers.

16 *Construction of xylose metabolism module.* The *xylAB* part of *E. coli xyl* operon encoding  
17 xylose isomerase (EC 5.3.1.5) XylA and xylulokinase (EC 2.7.1.17) XylB was amplified from  
18 genomic DNA of *E. coli* BL21 (DE3) using *xylAB* fw and *xylAB* rv primers. PCR product was  
19 digested with *EcoRI* and *BamHI* and ligated into pSEVA2213 giving rise to  
20 pSEVA2213\_*xylAB*. The gene of xylose-proton symporter (*xylE*) was amplified from the  
21 genomic DNA of *E. coli* BL21 (DE3) using two-step PCR protocol. In the first step, the gene  
22 was amplified using *xylE* fw 1 and *xylE* rv 1 primers. The sample of the reaction mixture with  
23 the PCR product (1 µL) was transferred into the second reaction with *xylE* fw 2 and *xylE* rv 2  
24 primers. Final PCR product was digested with *BamHI* and *HindIII* and cloned downstream

1 *xylAB* operon in pSEVA2213\_*xylAB* resulting in pSEVA2213\_*xylABE*. For the purpose of  
2 construction of the plasmid allowing translational fusion of XylE to monomeric superfolded  
3 GFP (msfGFP), *gfp* gene was initially amplified without its own RBS but with STOP codon  
4 from pSEVA238\_*gfp* plasmid (SEVA collection) using *gfpC* fw and *gfpC* rv primers. The PCR  
5 product was digested with *Hind*III and *Spe*I and ligated into pSEVA238, cut with the same pair  
6 of enzymes, giving rise to pSEVA238\_*gfpC*. The *xylE* gene was amplified from  
7 pSEVA2213\_*xylABE* with its synthetic RBS but without STOP codon using *xylE-gfp* fw and  
8 *xylE-gfp* rv primers. The PCR product was digested with *Bam*HI and *Hind*III and cloned  
9 upstream the *gfp* gene in pSEVA238\_*gfpC*, resulting in pSEVA238\_*xylE-gfpC*.

10 *Preparation of deletion mutants of P. putida EM42.* Deletion mutants were prepared using  
11 the protocol described previously (Aparicio et al., 2015). Briefly, the regions of approximately  
12 500 bp upstream and downstream the *gtsABCD* genes (PP\_1015 – PP\_1018) were PCR  
13 amplified with TS1F-*gtsABCD*, TS1R-*gtsABCD* and TS2F-*gtsABCD*, TS2R-*gtsABCD*  
14 primers, respectively. TS1 and TS2 fragments were joined through SOEing-PCR (Horton et  
15 al., 1990), the PCR product was digested with *Eco*RI and *Bam*HI and cloned into non-  
16 replicative pEMG plasmid. The resulting pEMG\_*gtsABCD* construct was propagated in *E. coli*  
17 CC118 $\lambda$ *pir* cells and the whole TS1-TS2 region was sequenced in several clones selected based  
18 on results of colony PCR with TS1F-*gtsABCD* and TS2R-*gtsABCD* primers (product of about  
19 1 kb expected). The sequence verified pEMG\_*gtsABCD* plasmid was transformed into  
20 competent EM42 cells by electroporation. Transformants were selected on LB agar plates with  
21 Km and co-integrates were identified by colony PCR with TS1F-*gtsABCD* and TS2R-  
22 *gtsABCD* primers. The pSW-I plasmid was transformed into selected co-integrate by  
23 electroporation. Transformants were plated on LB agar plates with Km and Amp and  
24 expression of I-SceI in selected clone inoculated into 5 mL of LB was induced with 1 mM 3-

1 methylbenzoic acid (3MB) overnight. Induced cells were plated on LB agar plates with Amp  
2 and the positive clone EM42  $\Delta gts$  with a loss of Km resistance marker and deletion was  
3 confirmed by colony PCR using check(-)gtsABCD fw and TS2R-gtsABCD primers. PCR  
4 product size in case of scarless deletion was 1250 bp. The quinoprotein glucose dehydrogenase  
5 gene *gcd* (PP\_1444) was deleted accordingly in *P. putida* EM42, resulting in *P. putida* EM42  
6  $\Delta gcd$ , and in *P. putida* EM42  $\Delta gts$ , resulting in *P. putida* EM42  $\Delta gts \Delta gcd$ , using a set of TS  
7 primers listed in **Table S1**. Expression of I-SceI in selected co-integrates was induced with 1  
8 mM 3MB for 6 hrs. Check(-)gcd fw and check(-)gcd rv primers were used to confirm deletion  
9 of *gcd* gene. PCR product size in case of deletion was 1500 bp. *P. putida* recombinants were  
10 cured of pSW-I plasmid after several passes in LB medium lacking Amp.

### 11 2.3. Calculations of dry cell weight and growth parameters

12 Biomass was determined as dry cell weight. Samples of cultures grown in M9 minimal  
13 medium with 5 g L<sup>-1</sup> glucose were transferred into 2 mL pre-dried and pre-weighed Eppendorf  
14 tubes and pelleted at 13,000 g for 10 min. The pellets were washed twice with distilled water  
15 and dried at 80°C for 48 h. Based on the prepared standard curve, one A<sub>600</sub> unit is equivalent  
16 to 0.38 g L<sup>-1</sup> of dry cell weight. Specific growth rate ( $\mu$ ) was determined during exponential  
17 growth as a slope of the data points obtained by plotting the natural logarithm of A<sub>600</sub> values  
18 against time. Substrate consumption rate ( $r$ ) was determined for initial 12 and 24 h of culture  
19 as  $r = (c \text{ substrate at } t_0 - c \text{ substrate at } t_1) / (t_1 - t_0)$ . Biomass yield ( $Y_{X/S}$ ) was determined 24 h  
20 after each culture started to grow exponentially as  $Y_{X/S} = c \text{ biomass at } t_1 / (c \text{ substrate at } t_0 - c$   
21  $\text{substrate at } t_1)$ . Specific carbon (C) consumption rate ( $q_s$ ) was determined during exponential  
22 growth on glucose or cellobiose as  $q_s = (\text{mmol C at } t_0 - \text{mmol C at } t_1) / ((t_1 - t_0) * (\text{g biomass at}$   
23  $t_1 - \text{g biomass at } t_0))$ .

24

## 1        2.4. Enzyme activity assays

2        For initial screening of  $\beta$ -glucosidase activities, 25 mL of LB medium was inoculated from  
3        overnight cultures to  $A_{600} = 0.05$  and cells were grown for 3 h at 30°C with shaking (170 rpm).  
4        Expression of  $\beta$ -glucosidase genes from pSEVA238 plasmid was then induced with 1 mM  
5        3MB. After induction, cells were grown in the same conditions for additional 5 h and then  
6        harvested by centrifugation (4,000 g, 4°C, 10 min). Cell pellets were lysed by adding 1 mL of  
7        BugBuster Protein Extraction Reagent with 1  $\mu$ L of Lysonase Bioprocessing Reagent (both  
8        from Merck Millipore, USA) for 15 min at RT with slow agitation. For later  $\beta$ -glucosidase  
9        activity measurement of BglC in EM42 recombinants, cell lysates were prepared by spinning  
10        (21,000 g, 4°C, 2 min) 4 mL of cells growing in 25 mL of minimal medium with 5 g L<sup>-1</sup>  
11        cellobiose (except for *P. putida* EM42  $\Delta$ gts  $\Delta$ gcd pSEVA2213\_ *bglC* recombinant, which was  
12        grown in LB medium). Cells were collected in mid log phase ( $A_{600} = 1.0$ ). Cell pellets were  
13        added with 200  $\mu$ L of BugBuster Protein Extraction Reagent and 0.2  $\mu$ L of Lysonase  
14        Bioprocessing Reagent and lysed for 15 min at RT with slow agitation. Cell lysates for xylose  
15        isomerase and xylulokinase activity determination were prepared by sonicating concentrated  
16        cell solutions prepared by spinning (4,000 g, 4°C, 10 min) 25 mL of cells grown in LB medium  
17        to  $A_{600} = 1.0$ . Cell pellets were washed by 5 mL of ice-cold 50 mM Tris-Cl buffer (pH 7.5)  
18        resuspended in 1 mL of the same buffer, placed in ice bath and disrupted by sonication. In all  
19        cases, cell lysates were centrifuged at 21,000 g for 30 min at 4°C and supernatants, termed here  
20        as cell-free extracts (CFE), were used for activity determination. Total protein concentration in  
21        CFE was measured using the method of Bradford (Bradford, 1976) with a commercial kit  
22        (Sigma-Aldrich, USA). Crystalline bovine serum albumin (Sigma-Aldrich, USA) was used as  
23        a protein standard.

1           β-glucosidase activity was measured using synthetic substrate *p*-nitrophenyl-β-D-  
2 glucopyranoside (pNPG; Sigma-Aldrich, USA). Reaction mixture of total volume = 600 μL  
3 contained 550 μL of 50 mM sodium phosphate buffer (pH 7.0), 30 μL of pNPG (final conc. 5  
4 mM), and 20 μL of CFE. Reaction was started by adding CFE to the mixture of buffer and  
5 substrate in Eppendorf tube pre-incubated 10 min at 37°C. CFE from *P. putida* cells producing  
6 BglC enzyme was diluted 100-200 times. Reaction was terminated after 15 min of incubation  
7 at 37°C in thermoblock by adding 400 μL of 1 M Na<sub>2</sub>CO<sub>3</sub>. Linearity of the enzymatic reaction  
8 during 15 min time course was initially verified by periodical withdrawal of the samples from  
9 reaction mixture of total volume of 1800 μL. Absorbance of the mixture was measured at 405  
10 nm with UV/Vis spectrophotometer Ultrospec 2100 (Biochrom, UK) and activity was  
11 calculated using calibration curve prepared with *p*-nitrophenol standard (Sigma-Aldrich,  
12 USA). β-glucosidase activity in culture supernatants was measured correspondingly with 166  
13 μL of culture supernatant in 600 μL of reaction mixture.

14           Activity of xylose isomerase (XylA) was measured as described by Le Meur and co-  
15 workers (2012) in microtiter plate format. In this assay, activity of XylA is coupled to  
16 consumption of NADH by sorbitol dehydrogenase. The assay mixture of total volume of 200  
17 μL contained 50 mM Tris-Cl buffer (pH 7.5), 1 mM triethanolamine, 0.2 mM NADH, 0.5 U of  
18 sorbitol dehydrogenase, 10 mM MgSO<sub>4</sub>, and 50 mM xylose. Reaction at 30°C was started by  
19 addition of 5 μL of CFE.

20           Xylulokinase (XylB) activity was determined using the assay described by Eliasson *et*  
21 *al.* (2000) in microtiter plate format. In this assay, XylB activity is coupled with activities of  
22 pyruvate kinase and lactate dehydrogenase leading to the consumption of NADH. The reaction  
23 mixture of total volume of 200 μL contained 50 mM Tris-Cl buffer (pH 7.5), 0.2 mM NADH,  
24 2 mM ATP, 2 mM MgCl<sub>2</sub>, 0.2 mM phosphoenolpyruvate, 10 U of pyruvate kinase and 10 U,

1 lactate dehydrogenase, and 10 mM D-xylulose. Reaction at 30°C was started by addition of 5  
2 µL of 20-fold diluted CFE.

3 Both in xylose isomerase and xylulokinase assay, the depletion of NADH was measured  
4 spectrophotometrically at 340 nm with Victor<sup>2</sup> 1420 Multilabel Counter (Perkin Elmer, USA).  
5 Molar extinction coefficient of 6.22 mM<sup>-1</sup> cm<sup>-1</sup> for NADH was used for activity calculations.  
6 1 unit (U) of activity corresponds to 1 µmol of substrate (pNPG or NADH) converted by  
7 enzyme per 1 min.

8 Activity of glucose dehydrogenase (Gcd) in *P. putida* EM42 and *P. putida* EM42 Δgcd was  
9 determined by measuring conversion of 5 g L<sup>-1</sup> xylose to xylonate by cell suspension of A<sub>600</sub> =  
10 0.55 in 25 mL of M9 medium at 30°C. The time course of the reaction was 6 h. 1 U of enzyme  
11 activity corresponds to 1 µmol of xylonate produced per 1 minute.

## 12 2.5. SDS-PAGE and Western blot analyses

13 CFE for determination of expression levels of selected enzymes were prepared using cell  
14 pellets from cultures induced with 1 mM 3MB and lysed with BugBuster Protein Extraction  
15 Reagent as described above. Samples of CFE containing 5 µg of total protein were added with  
16 5x Laemmli buffer, boiled at 95°C for 5 min and separated by SDS-PAGE using 12 % gels.  
17 CFE prepared from *P. putida* cells with empty pSEVA238 plasmid was used as control. Gels  
18 were stained with Coomassie Brilliant Blue R-250 (Fluka/Sigma-Aldrich, Switzerland).

19 The staining step was omitted for Western blotting. Instead, proteins were  
20 electrotransferred from gel onto Immobilon-P membrane (Merck Millipore, Germany) of pore  
21 size = 0.45 µm using Trans-Blot SD Semi-Dry Transfer Cell (Bio-Rad, USA). Transfer  
22 conditions were: constant electric current of 0.1 A per gel, voltage of 5-7 V, time of run 30  
23 min. Membrane was blocked overnight at 4°C in 3 % (w/v) dry milk in PBS buffer with 1 %

1 (v/v) TWEEN 20 and then incubated with mouse anti-6xHis tag monoclonal antibody-HRP  
2 conjugate (Clontech, USA) for 2 h at RT. Membrane was washed with PBS buffer with 1 %  
3 (v/v) TWEEN 20 and the proteins were visualized after incubation with BM  
4 Chemiluminescence Blotting Substrate (POD; Roche, Switzerland) using Amersham Imager  
5 600 (GE Healthcare Life Sciences, USA).

## 6 2.6. Determination of ATP levels in *P. putida* cells

7 The ATP content in *P. putida* recombinants growing in M9 minimal medium with 5 g L<sup>-1</sup>  
8 glucose or cellobiose was determined as described previously by Lai *et al.* (2016). Briefly, 2  
9 mL of cell culture of A<sub>600</sub> = 0.5, representing ~0.38 mg CDW, was centrifuged (13,000 g, 4°C  
10 2 min). Pellets were resuspended in 250 µL of ice-cold 20 mM Tris-Cl buffer (pH 7.75) with  
11 2 mM EDTA and ATP was extracted using the trichloroacetic acid (TCA) method (Lundin and  
12 Thore, 1975). Ice-cold 5 % (w/v) TCA (250 µL) with 4 mM EDTA was added, the suspension  
13 was mixed by vortexing for 20 s and incubated on ice for 20 min. Then, the suspension was  
14 centrifuged (13,000 g, 4°C, 10 min) and supernatant (10 µL) was diluted 20-fold with ice cold  
15 20 mM Tris-Cl buffer (pH 7.75) with 2 mM EDTA. The solution (50 µL) was mixed with 50  
16 µL of the reagent from bioluminescence based ATP determination kit (Biaffin, Germany)  
17 prepared according to the manufacturer's instructions. After 10 min of incubation in dark, the  
18 luminescence signal of diluted supernatants was read in white 96-well assay plate (Corning  
19 Incorporated, USA) using the microplate reader SpectraMax (Molecular Devices, USA). The  
20 luminescence was quantified using the calibration curve prepared with pure ATP (Sigma-  
21 Aldrich, USA).

22

23



## 1        2.7. Confocal microscopy

2        Localization of XylE transporter fused with msfGFP in the cell membrane was verified by  
3        confocal microscopy of cells expressing the chimeric gene from pSEVA238\_*xylE-gfp*C. Cells  
4        bearing pSEVA238\_*gfp* or empty pSEVA238 were used as controls. Cells were grown in LB  
5        medium (30°C, 275 rpm) until  $A_{600} = 0.5$ . Expression was induced with 0.5 mM 3MB and the  
6        growth continued at the same conditions for another 2.5 h. The sample of cell culture (100  $\mu$ L)  
7        was centrifuged (5,000 g, 4°C, 5 min). Cells were washed twice with 1.5 mL of ice cold  
8        phosphate buffer saline (PBS; per 1 L: 8 g NaCl, 0.2 g KCl, 1.44 g Na<sub>2</sub>HPO<sub>4</sub>, 0.24 g KH<sub>2</sub>PO<sub>4</sub>,  
9        pH adjusted to 7.4 with HCl) and finally resuspended in 1 mL of the same buffer. Cells (5  $\mu$ L  
10        of suspension) were mounted on poly-L-lysine coated glass slides (Sigma-Aldrich, USA) for  
11        20 min, covered with cover glass and the slides were analyzed using confocal multispectral  
12        microscope Leica TCS SP5 (Leica Microsystems, Germany).

## 13        2.8. Other analytical techniques

14        Cell growth was monitored by measuring absorbance of a cell suspension at 600 nm using  
15        UV/Vis spectrophotometer Ultrospec 2100 (Biochrom, UK). For determination of glucose,  
16        xylose, xylonate, and cellobiose concentrations, culture supernatant (0.5 mL) was centrifuged  
17        (21,000 g, 4°C, 10 min), filtered using Whatman Puradisc 4 mm syringe filter with nylon  
18        membrane (GE Healthcare Life Sciences, USA) and stored at -20°C for following analyses.  
19        Samples were analyzed by HPLC-LS system 920LC with light scattering (PL-ELS) detector  
20        (Agilent Technologies, USA) equipped with Microsorb MV NH<sub>2</sub> column (5  $\mu$ m, 250 mm x  
21        4.6 mm). MilliQ H<sub>2</sub>O (A) and acetonitrile (B) were used as eluents at a flow rate of 1 mL min<sup>-1</sup>  
22        <sup>1</sup>. Column temperature was 30°C. Chemicals were identified using pure compound standards.  
23        Glucose and xylose concentrations in culture supernatants were also determined by Glucose  
24        (GO) Assay Kit (Sigma-Aldrich, USA) and Xylose Assay Kit (Megazyme, Ireland),

1 respectively. Xylonic acid was measured using the hydroxamate method (Lien, 1959). Samples  
2 of culture supernatants (75  $\mu$ L) were mixed 1:1 with 1.3 M HCl and heated at 100°C for 20  
3 min to convert xylonate to xylono- $\gamma$ -lactone. Samples were cooled down on ice and 50  $\mu$ L were  
4 added to 100  $\mu$ L of hydroxylamine reagent freshly prepared by mixing 2 M hydroxylamine  
5 HCl with 2 M NaOH (pH of the reagent should be between 7 and 8). After 2 min interval, 65  
6  $\mu$ L of 3.2 M HCl and subsequently 50  $\mu$ L of FeCl<sub>3</sub> solution (10 g in 100 mL of 0.1 M HCl)  
7 were added. Absorbance at 550 nm was measured immediately using Victor<sup>2</sup> 1420 Multilabel  
8 Counter (Perkin Elmer, USA). Xylonate concentrations were quantified with a standard curve  
9 prepared using the pure compound (Sigma-Aldrich, USA).

## 10 *2.9. Statistical analyses*

11 All the experiments reported here were repeated independently at least twice (number of  
12 repetitions is specified in figure and table legends). The mean values and corresponding  
13 standard deviations (SD) are presented. When appropriate, data were treated with a two-tailed  
14 Student's t test in Microsoft Office Excel 2013 (Microsoft Corp., USA) and confidence  
15 intervals were calculated for given parameter to manifest a statistically significant difference  
16 in means between two experimental datasets.

17

18

19

20

21

22

1 **Table 1.** Strains and plasmids used in this study.

| Strain or plasmid                | Characteristics                                                                                                                                                                                                                           | Source or reference                   |
|----------------------------------|-------------------------------------------------------------------------------------------------------------------------------------------------------------------------------------------------------------------------------------------|---------------------------------------|
| <b><i>Escherichia coli</i></b>   |                                                                                                                                                                                                                                           |                                       |
| Dh5α                             | Cloning host: F-λ- <i>endA1 glnX44(AS) thiE1 recA1 relA1 spoT1 gyrA96(NalR) rfbC1 deoR nupG</i> Φ80( <i>lacZΔM15</i> ) Δ( <i>argF-lac</i> )U169 <i>hsdR17(r<sub>K</sub><sup>-</sup>m<sub>K</sub><sup>+</sup>)</i>                         | Grant et al. (1990)                   |
| CC118λpir                        | Cloning host: <i>araD139</i> Δ( <i>ara-leu</i> )7697 Δ <i>lacX74 galE galK phoA20 thi-1 rpsE rpoB(Rif<sup>R</sup>) argE(Am) recA1</i> , λpir lysogen                                                                                      | Herrero et al. (1990)                 |
| HB101                            | Helper strain for tri-parental mating: F- λ- <i>hsdS20(r<sub>B</sub><sup>-</sup> m<sub>B</sub><sup>-</sup>) recA13 leuB6(Am) araC14</i> Δ( <i>gpt-proA</i> )62 <i>lacY1 galK2(OC) xyl-5 mtl-1 thiE1 rpsL20(Sm<sup>R</sup>) glnX44(AS)</i> | Boyer and Roulland-Dussoix (1969)     |
| <b><i>Pseudomonas putida</i></b> |                                                                                                                                                                                                                                           |                                       |
| KT2440                           | Wild-type strain, spontaneous restriction-deficient derivative of strain mt-2 cured of the TOL plasmid pWW0                                                                                                                               | Bagdasarian et al. (1981)             |
| EM42                             | KT2440 derivative: Δprophages1,2,3,4 ΔTn7 Δ <i>endA1</i> Δ <i>endA2</i> Δ <i>hsdRMS</i> Δflagellum ΔTn4652                                                                                                                                | Martínez-García et al. (2014b)        |
| EM42 Δ <i>gts</i>                | EM42 with scarless deletion of <i>gtsABCD</i> operon (PP_1015-PP_1018) encoding glucose ABC transporter                                                                                                                                   | this study                            |
| EM42 Δ <i>gcd</i>                | EM42 with scarless deletion of <i>gcd</i> gene (PP_PP1444) encoding periplasmic glucose dehydrogenase                                                                                                                                     | this study                            |
| EM42 Δ <i>gts</i> Δ <i>gcd</i>   | EM42 with scarless deletions of <i>gtsABCD</i> and <i>gcd</i>                                                                                                                                                                             | this study                            |
| EM42 Δ <i>gcd</i> <i>bgIC</i>    | EM42 Δ <i>gcd</i> with synthetic expression cassette (pEM7 <i>bgIC aadA</i> , Sm <sup>R</sup> ) in chromosome                                                                                                                             | this study                            |
| <b>plasmids</b>                  |                                                                                                                                                                                                                                           |                                       |
| pRK600                           | Helper plasmid for tri-parental mating: <i>oriV(ColE1) RK2 tra<sup>+</sup> mob<sup>+</sup></i> , Cm <sup>R</sup>                                                                                                                          | Kessler et al. (1994)                 |
| pSEVA238                         | Expression vector: <i>oriV(pBBR1) xylS-Pm neo</i> , Km <sup>R</sup>                                                                                                                                                                       | Silva-Rocha et al. (2013)             |
| pSEVA238_ <i>gfp</i>             | pSEVA238 bearing the gene of monomeric superfolder GFP (msfGFP)                                                                                                                                                                           | SEVA collection                       |
| pSEVA2213                        | Expression vector: <i>oriV(RK2) pEM7 neo</i> , Km <sup>R</sup>                                                                                                                                                                            | Silva-Rocha et al. (2013)             |
| pBAMD1-4                         | Mini-Tn5 delivery plasmid: <i>ori(R6K) bla aadA</i> , Amp <sup>R</sup> Sm <sup>R</sup> /Sp <sup>R</sup>                                                                                                                                   | Martínez-García et al. (2014a)        |
| pEMG                             | Plasmid for genome editing in Gram-negative bacteria: <i>ori(R6K) neo</i> , Km <sup>R</sup>                                                                                                                                               | Martínez-García and de Lorenzo (2012) |

|                            |                                                                                                                                                                     |                                       |
|----------------------------|---------------------------------------------------------------------------------------------------------------------------------------------------------------------|---------------------------------------|
| pSW-I                      | Expression vector with gene of I-SceI, a homing endonuclease from <i>Saccharomyces cerevisiae</i> : ori(RK2) <i>xylS-Pm bla</i> , Amp <sup>R</sup>                  | Martínez-García and de Lorenzo (2012) |
| pET21a_ <i>bglC</i>        | Expression vector (Novagen) with <i>bglC</i> gene encoding β-glucosidase from <i>Thermobifida fusca</i> : ori(pBR322) <i>lacI T7 bla</i> , Amp <sup>R</sup>         | Prof. Edward A. Bayer laboratory      |
| pSEVA238_ <i>gfpC</i>      | pSEVA238 with <i>gfp</i> gene encoding monomeric superfolder green fluorescent protein (msfGFP) lacking RBS but with TAG STOP codon ( <i>HindIII/SpeI</i> )         | this study                            |
| pSEVA238_ <i>bglC</i>      | pSEVA238 with <i>bglC</i> gene ( <i>SacI/PstI</i> )                                                                                                                 | this study                            |
| pSEVA238_ <i>ccel2454</i>  | pSEVA238 with <i>ccel2454</i> gene encoding β-glucosidase from <i>Clostridium cellulolyticum</i> ( <i>KpnI/PstI</i> )                                               | this study                            |
| pSEVA238_ <i>bglX</i>      | pSEVA238 with <i>bglX</i> gene encoding putative β-glucosidase from <i>P. putida</i> KT2440 ( <i>NdeI/HindIII</i> )                                                 | this study                            |
| pSEVA2213_ <i>bglC</i>     | pSEVA2213 with <i>bglC</i> gene ( <i>SacI/PstI</i> )                                                                                                                | this study                            |
| pSEVA2213_ <i>xylAB</i>    | pSEVA2213 with <i>xylAB</i> part of <i>xyl</i> operon from <i>E. coli</i> encoding XylA xylose isomerase and xylB xylulokinase ( <i>EcoRI/BamHI</i> )               | this study                            |
| pSEVA2213_ <i>xylABE</i>   | pSEVA2213_ <i>xylAB</i> with <i>xylE</i> gene from <i>E. coli</i> encoding Xyle xylose-proton symporter ( <i>BamHI/HindIII</i> )                                    | this study                            |
| pSEVA238_ <i>xylE-gfpC</i> | pSEVA238_ <i>gfpC</i> with <i>xylE</i> gene subcloned in frame upstream <i>gfp</i> ( <i>BamHI/HindIII</i> ); <i>xylE</i> lacks STOP codon but has own consensus RBS | this study                            |
| pEMG_ <i>gtsABCD</i>       | pEMG with the sequences (~500 bp) spanning upstream and downstream the <i>gtsABCD</i> operon in <i>P. putida</i> KT2440 genome ( <i>EcoRI/BamHI</i> )               | Dr. Alberto Sánchez-Pascuala          |
| pEMG_ <i>gcd</i>           | pEMG with the sequences (~500 bp) spanning upstream and downstream the <i>gcd</i> gene in <i>P. putida</i> KT2440 genome ( <i>EcoRI/BamHI</i> )                     | Dr. Alberto Sánchez-Pascuala          |

1 Abbreviations: RBS, ribosome binding site; Amp, ampicillin; Km, kanamycin; Sm, streptomycin; Sp,  
2 spektinomycin.

3

4

5

6

### 1        **3. Results and discussion**

#### 2        *3.1. Engineering the cellobiose metabolism module*

3            Initial tests with *P. putida* EM42 in minimal medium with cellobiose showed no growth  
4 of this platform strain on the disaccharide (**Fig. 2A**). The absence of cellobiose assimilation  
5 implied either lack of transport through the cell membranes or missing enzymatic machinery  
6 for disaccharide hydrolysis or phosphorylation. As we detected no  $\beta$ -glucosidase (EC 3.2.1.21)  
7 activity in culture supernatants or lysates prepared from cells incubated with cellobiose, we  
8 focused initially on the latter bottleneck. Previous attempts to engineer bacteria for cellobiose  
9 utilization and valorization included periplasmic or extracellular  $\beta$ -glucosidase expression  
10 (Chen et al., 2011; Rutter et al., 2013), or its surface display (Muñoz-Gutiérrez et al., 2014).  
11 This last approach was also recently used for *P. putida* KT2440, but surface display of three  
12 cellulases, including  $\beta$ -glucosidase BglA from *Clostridium thermocellum*, resulted in only  
13 trace conversion of cellulosic substrate into glucose (Tozakidis et al., 2016). Alternative  
14 strategies included intracellular assimilation of cellobiose *via* endogenous or exogenous  $\beta$ -  
15 glucosidase (Ha et al., 2011; Vinuselvi and Lee, 2011), and *via* phosphorylation catalyzed by  
16 cellobiose phosphorylase (Shin et al., 2014). Despite the need for an efficient cellobiose  
17 transporter, intracellular assimilation is generally regarded as more efficient, because it  
18 circumvents carbon catabolite repression (CCR) and prevents cellobiose inhibition of  
19 extracellular cellulases in the bioreactor (Ha et al., 2011; Parisutham et al., 2017; Teugjas and  
20 Väljamäe, 2013).

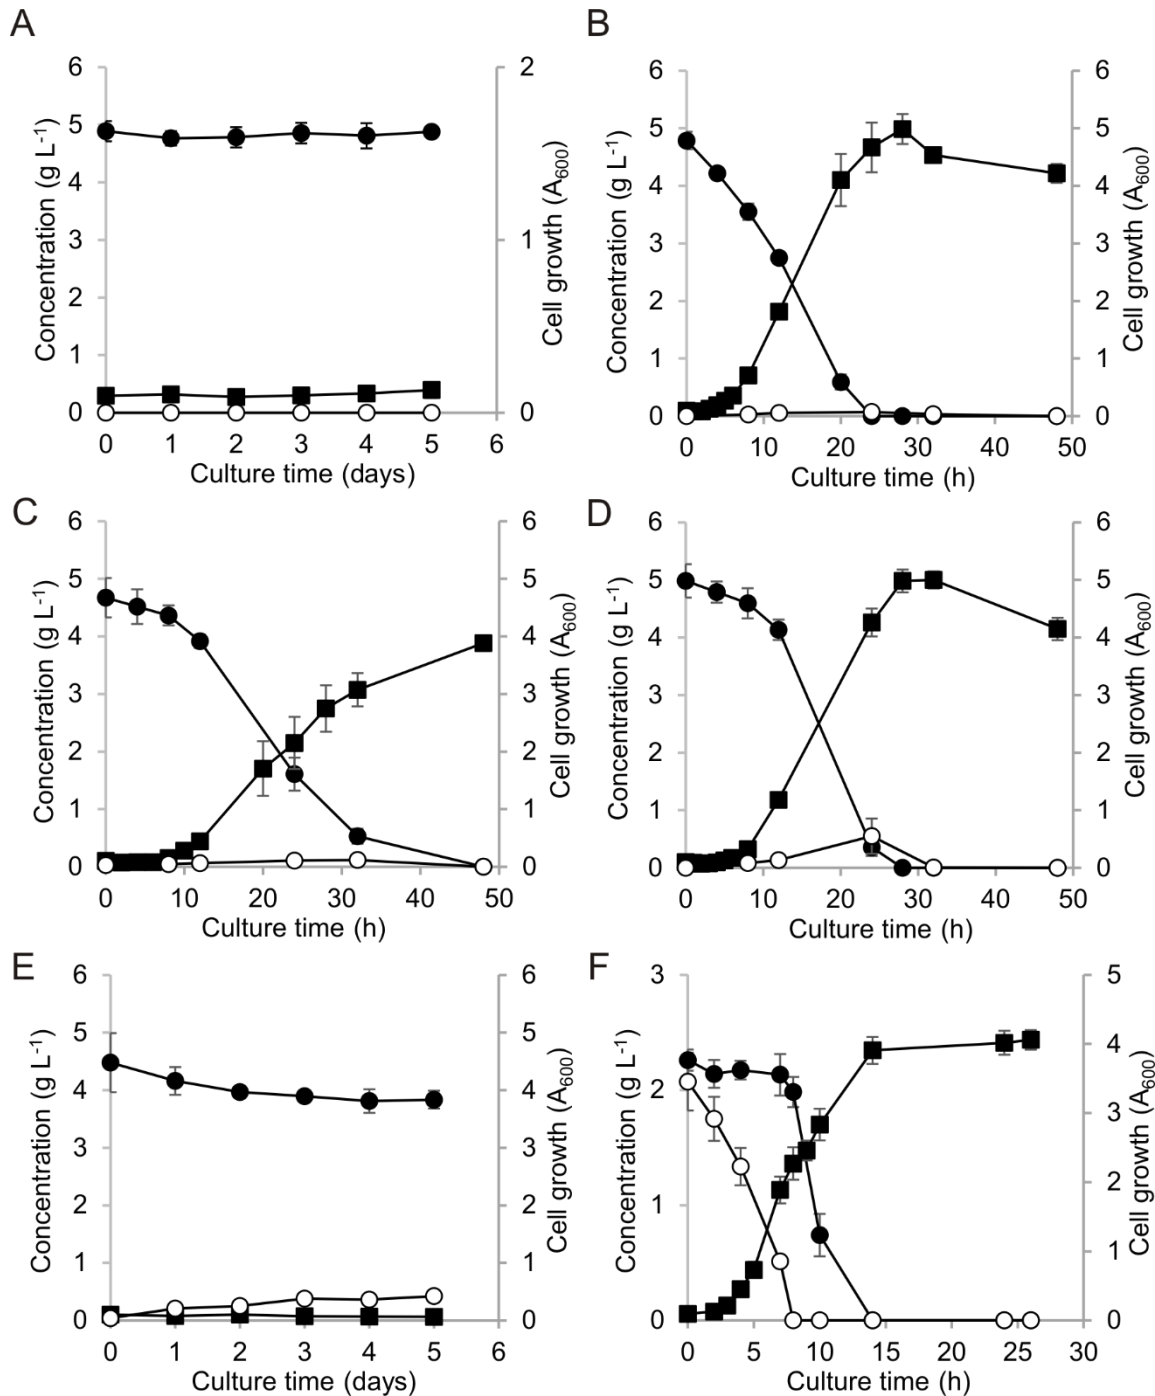

1

2 **Figure 2.** Growth of *P. putida* EM42 and its recombinants in minimal medium with 5 g L<sup>-1</sup> D-  
3 cellobiose. Experiments were carried out in shaken flasks (30°C, 170 rpm). (A) *P. putida*  
4 EM42, (B) *P. putida* EM42 pSEVA2213\_bglC, (C) *P. putida* EM42 Δgts pSEVA2213\_bglC,  
5 (D) *P. putida* EM42 Δgcd pSEVA2213\_bglC, (E) *P. putida* EM42 Δgts Δgcd  
6 pSEVA2213\_bglC, (F) *P. putida* EM42 pSEVA2213\_bglC in minimal medium with D-  
7 glucose and D-cellobiose (2 g L<sup>-1</sup> each). D-cellobiose, filled circles (●); D-glucose, open circles  
8 (○); cell growth, filled squares (■). Data points shown as mean ± SD from two to three  
9 independent experiments.

1 In *P. putida* EM42, we probed functional expression of two different intracellular  $\beta$ -  
2 glucosidases, Ccel\_2454 from the Gram-positive mesophilic bacterium *Clostridium*  
3 *cellulolyticum* and BglC from the Gram-positive thermophilic bacterium *Thermobifida fusca*  
4 (see **Supporting information** for nucleotide sequences of all enzymes used in this study). Both  
5 enzymes have been expressed successfully in *E. coli* and are compatible with moderate  
6 temperatures and neutral or slightly acidic pH (Desai et al., 2014; Fan et al., 2012; Spiridonov  
7 and Wilson, 2001). In addition, we overexpressed the EM42 endogenous *bglX* gene (PP\_1403),  
8 which is annotated as periplasmic  $\beta$ -glucosidase in the Pseudomonas Genome Database  
9 ([www.pseudomonas.com/](http://www.pseudomonas.com/)). The enzyme has relatively high amino acid sequence identity (61  
10 %) with the well-characterized *E. coli*  $\beta$ -glucosidase BglX (Yang et al., 1996). Each of these  
11 genes was cloned into the pSEVA238 plasmid downstream of the inducible XylS/Pm promoter.  
12 We tested the effect of gene expression on EM42 viability, as well as soluble protein production  
13 and enzyme activity in cell-free extracts (CFE).

14 All three enzymes were produced in the soluble fraction of the *P. putida* chassis grown  
15 in LB medium (**Fig. S1A**), but only Ccel\_2454 and BglC showed measurable  $\beta$ -glucosidase  
16 activity. No activity was detected in CFE containing endogenous BglX, whose overexpression  
17 also had a clear toxic effect on the host (**Fig. S2**). Absence of BglX  $\beta$ -glucosidase activity  
18 might be explained by loss of protein function due to a mutation(s) gained during a period when  
19 the bacterium was not benefited by the enzyme. The Ccel\_2454 activity ( $0.03 \pm 0.01$  U/1 mg  
20 of total protein in CFE) measured with the colorimetric substrate p-nitrophenol-beta-D-  
21 glucopyranoside at 37°C (pH 7.0) was limited. In contrast, CFE of *P. putida* EM42 expressing  
22 the *bglC* gene showed high activity ( $4.57 \pm 0.50$  U mg<sup>-1</sup>). Trace BglC activity was also detected  
23 in culture supernatants ( $2.76 \pm 0.24$  U L<sup>-1</sup>), which indicates that a small amount of  
24 overexpressed enzyme can exit the cell during growth through an unknown mechanism.

1 Western blot analysis of a CFE sample containing His-tagged BglC and a sample of culture  
2 supernatant (**Fig. S1B**) nonetheless confirmed that the great majority of the protein was  
3 expressed intracellularly. After induction with 0.2 mM 3-methylbenzoate (3MB), strong BglC  
4 expression and activity enabled growth of the host strain in minimal medium with 5 g L<sup>-1</sup>  
5 cellobiose as a sole carbon source. In this preliminary shake flask experiment, the OD<sub>600</sub> at 48  
6 h was 3.6 (data not shown).

7 The *bglC* gene was subsequently subcloned into the low copy plasmid pSEVA2213  
8 with the constitutive promoter pEM7 that functions well in both *P. putida* and *E. coli* (Zobel et  
9 al., 2015). The *P. putida* EM42 bearing the pSEVA2213\_ *bglC* construct grew rapidly in  
10 minimal medium with 5 g L<sup>-1</sup> cellobiose, with only a ~2 h adaptation period and a specific  
11 growth rate of  $0.35 \pm 0.02$  h<sup>-1</sup> (**Fig. 2B, Table 2**). The substrate consumption rate and biomass  
12 yield parameters were about 40 % and 20 % lower, respectively, than those of *P. putida* EM42  
13 pSEVA2213 cultured in minimal medium with glucose (**Table 2**). As all disaccharide was  
14 consumed within 24 h of culture, the *P. putida* strain outperformed the best engineered *E. coli*  
15 strain CP12CHBASC30, which assimilated 3.3 g L<sup>-1</sup> of cellobiose after 32 h in comparable  
16 conditions (Vinuselvi and Lee, 2011). No growth was observed of *E. coli* Dh5 $\alpha$  transformed  
17 with pSEVA2213\_ *bglC* and incubated in the same conditions, despite the relatively high  $\beta$ -  
18 glucosidases activity ( $1.51 \pm 0.12$  U mg<sup>-1</sup>) detected in these cells. This result highlights the  
19 excellent match in between the BglC cellulase selected and the *P. putida* host.

20  
21  
22  
23  
24  
25  
26  
27



1 **Table 2.** Growth parameters for batch cultures of *Pseudomonas putida* EM42 recombinants  
 2 carried out on cellobiose. Values shown as mean  $\pm$  SD from two to three independent  
 3 experiments.

| Strain                                           | $\mu$ (h <sup>-1</sup> ) <sup>a</sup> | Substrate consumption rate at 12/24 h (g L <sup>-1</sup> h <sup>-1</sup> ) <sup>b</sup> | Y <sub>X/S</sub> (g g <sup>-1</sup> ) <sup>c</sup> | BglC specific activity (U mg <sup>-1</sup> ) |
|--------------------------------------------------|---------------------------------------|-----------------------------------------------------------------------------------------|----------------------------------------------------|----------------------------------------------|
| EM42<br>pSEVA2213_bglC                           | 0.35 $\pm$ 0.02                       | 0.17 $\pm$ 0.01/0.20 $\pm$ 0.01                                                         | 0.37 $\pm$ 0.05                                    | 6.48 $\pm$ 0.75                              |
| EM42 $\Delta$ gts<br>pSEVA2213_bglC              | 0.29 $\pm$ 0.04                       | 0.06 $\pm$ 0.02/0.13 $\pm$ 0.03                                                         | 0.31 $\pm$ 0.06                                    | 4.73 $\pm$ 0.36                              |
| EM42 $\Delta$ gcd<br>pSEVA2213_bglC              | 0.30 $\pm$ 0.05                       | 0.07 $\pm$ 0.01/0.19 $\pm$ 0.01                                                         | 0.38 $\pm$ 0.00                                    | 5.18 $\pm$ 0.47                              |
| EM42 $\Delta$ gts $\Delta$ gcd<br>pSEVA2213_bglC | n.d.                                  | n.d.                                                                                    | n.d.                                               | 1.22 $\pm$ 0.20 <sup>e</sup>                 |
| EM42 $\Delta$ gcd bglC                           | 0.28 $\pm$ 0.03                       | 0.26 $\pm$ 0.02/0.22 $\pm$ 0.00                                                         | 0.29 $\pm$ 0.06                                    | 3.78 $\pm$ 0.35                              |
| EM42 pSEVA2213 <sup>f</sup>                      | 0.60 $\pm$ 0.03                       | 0.23 $\pm$ 0.00/0.21 $\pm$ 0.00                                                         | 0.48 $\pm$ 0.03                                    | n.d.                                         |

4 <sup>a</sup> The specific growth rate ( $\mu$ ) was determined during exponential growth.

5 <sup>b</sup> The substrate consumption rate for cellobiose and glucose was determined for the initial 12 and 24 h of culture.

6 <sup>c</sup> The biomass yield on substrate (Y<sub>X/S</sub>) was determined 24 h after each culture began to grow exponentially.

7 <sup>d</sup> Specific activities were determined in cell free extracts prepared from cells grown on cellobiose to A<sub>600</sub> = 1.0.

8 <sup>e</sup> Specific activity of BglC in EM42  $\Delta$ gts  $\Delta$ gcd pSEVA2213\_bglC recombinant was determined in cell-free  
 9 extracts obtained from cells grown in LB medium.

10 <sup>f</sup> Strain with empty pSEVA2213 plasmid cultured in minimal medium with 5 g L<sup>-1</sup> glucose as a sole carbon source.

11

12

### 13 3.2. Understanding cellobiose transport in *P. putida* EM42

14 To decipher transport pathways for cellobiose (a glucose dimer) in *P. putida*, we first  
 15 focused on the well-described importation of monomeric glucose (del Castillo et al., 2007).  
 16 There are two routes for glucose assimilation in *P. putida* KT2440. The first route encompasses  
 17 direct translocation of a glucose molecule from periplasm to cytoplasm by the ATP-dependent  
 18 ABC transporter, encoded by the *gtsABCD* operon (PP\_1015-PP\_1018), and subsequent  
 19 phosphorylation of hexose to glucose-6-phosphate by glucokinase (del Castillo et al., 2007).  
 20 The second is a periplasmic pathway formed by membrane-bound PQQ-dependent glucose  
 21 dehydrogenase Gcd (PP\_1444). This enzyme oxidizes D-glucose to D-glucono-1,5-lactone,  
 22 which is hydrolyzed either spontaneously or by the action of gluconolactonase Gnl (PP\_1170)

1 to D-gluconate. Gluconate can be further oxidized to 2-keto-D-gluconate by periplasmic  
2 gluconate dehydrogenase (Gad). Both gluconate and 2-ketogluconate can pass through the  
3 outer membrane or are imported into the cytoplasm, where the oxidation pathway merges with  
4 the direct phosphorylation route at the level of 6-phospho-D-gluconate (del Castillo et al.,  
5 2007).

6 Uptake of cellobiose and other cellodextrins of varying lengths through the ABC-type  
7 transporters is common in cellulolytic bacteria due to the relatively broad specificity of these  
8 systems (Nataf et al., 2009; Parisutham et al., 2017). To test its relevance for cellobiose uptake  
9 in EM42 strain, we deleted the *gtsABCD* operon that encodes the ABC glucose transporter.  
10 The mutant transformed with the pSEVA2213\_ *bglC* plasmid showed a substantially prolonged  
11 (~7 h) adaptation phase on cellobiose (**Fig. 2C**). Three determined growth parameters were  
12 reduced when compared with *P. putida* EM42 pSEVA2213\_ *bglC* (**Table 2**). The results  
13 suggested that the glucose ABC transporter plays an important role in cellobiose uptake, but is  
14 not the only access route for the disaccharide in *P. putida*.

15 Closure of the second glucose uptake route by deleting the glucose dehydrogenase gene  
16 *gcd* in *P. putida* EM42 had no notable effect on growth on cellobiose, but slightly prolonged  
17 the lag phase (~3 h; **Fig. 2D**). Substrate consumption during the initial 12 h of growth was  
18 nonetheless significantly reduced (**Table 2**), which might be attributed to the uptake of  
19 cellobiose only through the direct phosphorylation route and slower initial expression of ABC  
20 transporter components that is normally induced by monomeric glucose (del Castillo et al.,  
21 2007). It is worth noting here that neither the genes which encode two out of three  
22 carbohydrate-selective porins (*oprB-1* and *oprB-2*) adjacent to *gtsABCD* and *gcd*, respectively,  
23 nor their regulatory sequences were affected by the scarless deletions.

1 Growth on disaccharide was completely abolished when the deletions in the direct  
2 phosphorylation and oxidative routes were combined (**Fig. 2E, Table 2**). It can be thus argued  
3 that the peripheral glucose pathway also takes part in cellobiose assimilation by *P. putida*. One  
4 could speculate that Gcd also has cellobiose dehydrogenase activity (EC 1.1.99.18) and  
5 converts cellobiose to cellobiono-1,5-lactone (Henriksson et al., 2000). Much like glucono-1,5-  
6 lactone, in the presence of water cellobiono-1,5-lactone might be hydrolyzed spontaneously to  
7 cellobionic acid, which would be transported to the cytoplasm. Intracellular  $\beta$ -glucosidase  
8 could then cleave cellobionate to glucose and gluconic acid (Li et al., 2015), two molecules  
9 easily metabolized by *P. putida*. Nonetheless, neither cellobionic acid formation nor its further  
10 metabolism in *P. putida* can be confirmed based on currently available experimental data.  
11 Hence, the detailed functioning of the peripheral oxidative route in upper cellobiose  
12 metabolism in *P. putida* remains to be elucidated by our future experiments.

13 From the acquired growth parameters of these *P. putida* mutants, it can be deduced that  
14 the direct phosphorylation route is of major importance for cellobiose assimilation. On the  
15 other hand, experimental evidence shows that glucose enters *P. putida* cells predominantly  
16 through the peripheral oxidative pathway (Nikel et al., 2015). Despite these opposing access  
17 route preferences, when *P. putida* EM42 pSEVA2213\_bglC was exposed to a mixture of the  
18 two sugars (2 g L<sup>-1</sup> each), we observed diauxic growth (**Fig. 2F**). Glucose was utilized first  
19 during the initial 8 h of the experiment. When all hexose was removed from the medium,  
20 cellobiose was consumed rapidly during the next 6 h of the culture. To conclude, these  
21 experiments suggest that glucose and cellobiose share the same access routes in *P. putida* and  
22 that monomeric hexose is a preferred substrate in the mixture of the two carbon sources.

23

24

1           3.3. Probing energetic benefit of cellobiose metabolism in engineered *P. putida*

2           ATP is a universal energy source and a major driving force for biochemical processes  
3           in microbial cell factories (Hara and Kondo, 2015). Due to its variant of glycolysis – the Entner-  
4           Doudoroff pathway - *P. putida* yields only one net ATP per one mole of assimilated glucose  
5           (Nikel et al., 2015). In the case, for instance, of *E. coli* with its characteristic Embden–  
6           Meyerhof–Parnas pathway, the ATP yield per molecule of glucose is twice as high. It is thought  
7           that environmental or engineered microorganisms that prefer to metabolize cellobiose instead  
8           of glucose are more energetic and robust than their glucose-utilizing counterparts (Chen, 2015;  
9           Lynd et al., 2002; Parisutham et al., 2017). The benefits were demonstrated in bacteria with a  
10          cellobiose-specific PEP-phosphotransferase system transporter, in which one mole of ATP is  
11          consumed per one mole of imported substrate; this was also apparent in microbes that  
12          metabolize cellobiose through phosphorolysis, in which only one ATP per disaccharide is  
13          needed to form two activated molecules of glucose (Kajikawa and Masaki, 1999; Shin et al.,  
14          2014; Thurston et al., 1993).

15

16

17

18

19

20

21

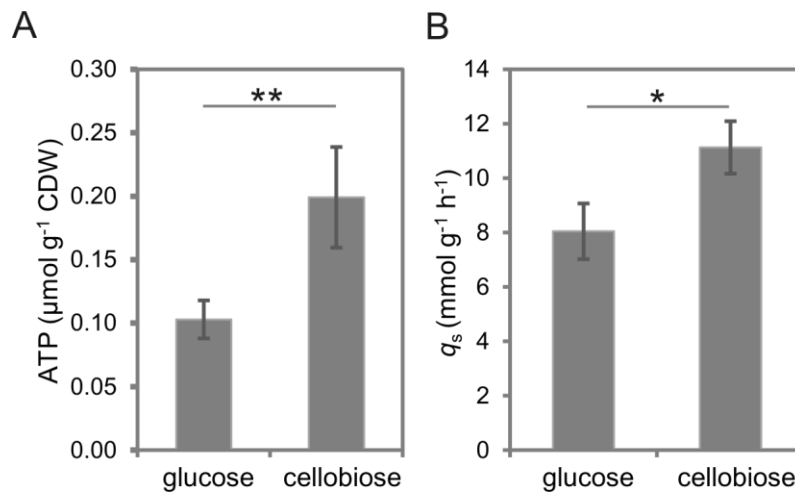

1

2 **Figure 3.** Energetic benefit of *P. putida* EM42 cells growing on D-cellobiose. (A) Comparison  
3 of intracellular ATP concentrations in *P. putida* EM42 pSEVA2213 growing on  $5 \text{ g L}^{-1}$  D-  
4 glucose and in *P. putida* EM42 pSEVA2213\_ *bglC* growing in minimal medium with  $5 \text{ g L}^{-1}$   
5 D-cellobiose. Measurements were performed with cells collected from cultures in exponential  
6 growth ( $A_{600} = 0.5$ ). (B) Specific carbon consumption rate ( $q_s$ ) for glucose ( $8.04 \pm 1.02$ ) and  
7 cellobiose ( $11.13 \pm 0.96$ ) determined in the exponential growth phase for *P. putida* EM42  
8 pSEVA2213 and *P. putida* EM42 pSEVA2213\_ *bglC*, respectively. Data shown as mean  $\pm$  SD  
9 from three independent experiments. Asterisks denote significance in difference in between  
10 two means at  $P < 0.05$  (\*) or  $P < 0.01$  (\*\*).

11

12

13 We determined ATP levels in EM42 pSEVA2213 and EM42 pSEVA2213\_ *bglC* strains  
14 grown on glucose and cellobiose, respectively, to evaluate the effect of altered substrate on *P.*  
15 *putida* energy status (**Fig. 3A**). Indeed, the ATP level in *P. putida* grown on cellobiose was  
16 almost double that of the cells cultured on glucose. ATP savings could partially stem from  
17 cellobiose transport. One ATP per molecule of glucose is theoretically saved when cellobiose  
18 enters the cell with the help of an ABC-type transporter, as the ATP cost is known to be  
19 constant per import event (Parisutham et al., 2017). The oxidative pathway is also thought to  
20 provide the cell with additional energy through the transfer of electrons from membrane-bound  
21 Gcd and Gad directly to the respiratory chain enzymes (Ebert et al., 2011). The higher ATP  
22 level on cellobiose was not accompanied by more efficient conversion of carbon into biomass  
23 (**Table 2, Fig. 3B**), which might be attributed to the higher respiration activity of the cells

1 grown on cellobiose (Ebert et al., 2011). An extraordinary amount of ATP in the cell could also  
2 inhibit citrate synthase, which would slow down the TCA cycle as well as formation of biomass  
3 precursors (Smith and Williamson, 1971). To sum up, the ATP saved during the growth on a  
4 biotechnologically relevant substrate will further increase the value of the engineered EM42  
5 platform strain as a cell factory for bioproduction.

6

### 7 *3.4.Engineering metabolic module for xylose utilization*

8 To test the capacity of *P. putida* to co-utilize cellobiose with pentoses, we established  
9 a D-xylose metabolism in our platform strain EM42. *Pseudomonas putida* KT2440 is unable  
10 to utilize xylose as a sole carbon source for growth (Le Meur et al., 2012; Nogales et al., 2017;  
11 Puchałka et al., 2008). Both KT2440 and *P. putida* S12, another pseudomonad with  
12 biotechnological potential, were nonetheless engineered successfully for xylose utilization by  
13 implementation of the isomerase pathway from *E. coli* (Le Meur et al., 2012; Meijnen et al.,  
14 2008). This route fuels the pentose phosphate pathway *via* the action of xylose isomerase (EC  
15 5.3.1.5) and xylulokinase (EC 2.7.1.17), which convert D-xylose to D-xylulose-5-phosphate  
16 (**Fig. 1**). We aimed at following the same strategy in our study.

17 We first verified the absence of xylose catabolism in *P. putida* EM42. Our  
18 bioinformatic analysis confirmed that the KT2440 genome has no genes that encode  
19 homologues of *E. coli* XylA or XylB proteins. The EM42 strain was then incubated in minimal  
20 medium with xylose, and the cell density and substrate concentration were measured for five  
21 consecutive days (**Fig. 4A**). No growth was detected, despite the fact that only 10% of the  
22 starting xylose concentration was detected in the culture medium after five days. Meijnen and  
23 co-workers (2008) described a similar phenomenon for engineered *P. putida* S12. In that case,  
24 the majority of D-xylose was oxidized to the dead-end product D-xylonate by the periplasmic

1 glucose dehydrogenase Gcd. In fact, xylonate concentrations determined in samples from the  
2 five-day experiment with the strain EM42 suggested that all xylose was converted to the acid,  
3 which was not assimilated by the cells (**Fig. 4A**). Xylonate formation was accompanied by a  
4 decrease in the culture pH from 7.0 to 6.2. This initial experiment provided additional evidence  
5 of Gcd broad substrate specificity in *P. putida* KT2440 and its derivatives. The phenomenon  
6 of xylonate formation was not discussed in the study by Le Meur and colleagues (2012), who  
7 implanted the isomerase pathway in the KT2440 strain.

8

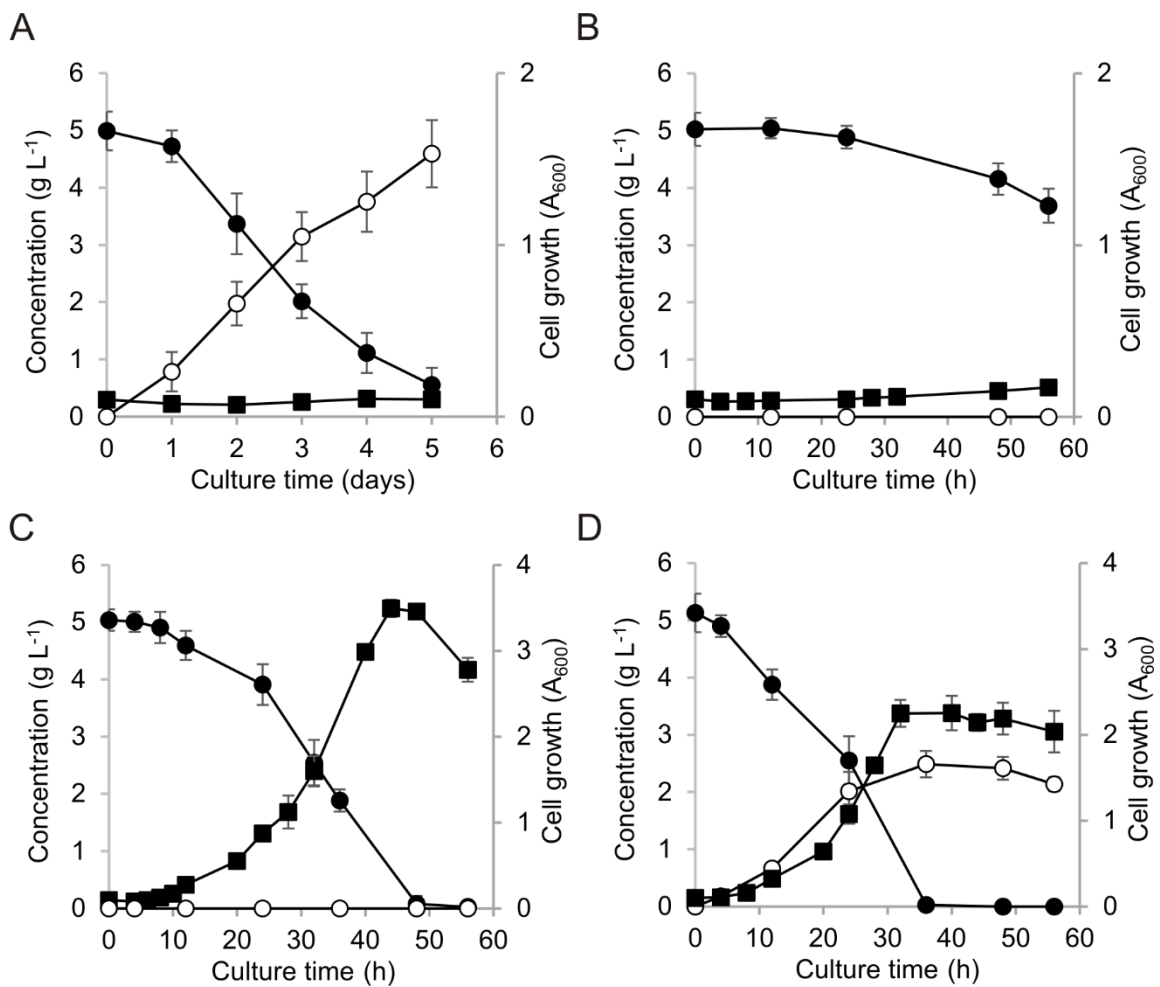

10 **Figure 4.** Growth of *P. putida* EM42 and its recombinants in minimal medium with 5 g L<sup>-1</sup> D-  
11 xylose. Experiments were carried out in shaken flasks at 30°C and 170 rpm. (A) *P. putida*  
12 EM42, (B) *P. putida* EM42  $\Delta$ gcd pSEVA2213\_xylAB, (C) *P. putida* EM42  $\Delta$ gcd  
13 pSEVA2213\_xylABE, (D) *P. putida* EM42 pSEVA2213\_xylABE. D-xylose, closed circles (●);

1 D-xylonate, open circles (○); cell growth, closed squares (■). Data shown as mean ± SD from  
2 three independent experiments.

3

4

5

6

7

8 To avoid accumulation of an undesirable metabolite, we transplanted the *xylAB*  
9 fragment of the *xyl* operon from *E. coli* BL21 (DE3), which encodes xylose isomerase XylA  
10 and xylulokinase XylB, directly to *P. putida* EM42  $\Delta gcd$ . The *xylAB* fragment was amplified  
11 as a whole. The *xylA* gene (**SI sequences**) was provided with a consensus RBS, with the native  
12 RBS maintained upstream of the *xylB* gene. The fragment was cloned into pSEVA2213 and  
13 *xylAB* expression was verified in the EM42  $\Delta gcd$  strain (**Fig. S3**). XylA and XylB activities  
14 determined in CFE were higher than those reported for engineered *P. putida* S12 growing on  
15 xylose (**Table 3**) (Meijnen et al., 2008). The recombinant EM42 cells nonetheless showed only  
16 limited growth and substrate uptake in minimal medium with 5 g L<sup>-1</sup> xylose (**Table 3, Fig. 4B**).  
17 When xylonate accumulation no longer hindered efficient cell use of xylose, we found substrate  
18 transport to be another bottleneck to xylose metabolism in this host. This was not anticipated  
19 based on a previous study with the xylose-utilizing KT2440 strain, which reported only  
20 implantation of the XylAB metabolic module with no transport system (Le Meur et al., 2012).  
21 In another report, an upregulated glucose ABC transporter was nonetheless defined as one of  
22 the major changes that shaped laboratory-evolved *P. putida* S12 towards rapid growth on  
23 xylose (Meijnen et al., 2012).

24

25



1 **Table 3.** Growth parameters and specific activities of xylose isomerase and xylulokinase for  
 2 batch cultures of *Pseudomonas putida* EM42 recombinants carried out on xylose. Data shown  
 3 as mean  $\pm$  SD from three independent experiments.

| Strain                                               | $\mu$ (h <sup>-1</sup> ) <sup>a</sup> | Substrate consumption rate (g L <sup>-1</sup> h <sup>-1</sup> ) <sup>b</sup> | Y <sub>X/S</sub> (g g <sup>-1</sup> ) <sup>c</sup> | XylA specific activity (U mg <sup>-1</sup> ) <sup>d</sup> | XylB specific activity (U mg <sup>-1</sup> ) <sup>d</sup> |
|------------------------------------------------------|---------------------------------------|------------------------------------------------------------------------------|----------------------------------------------------|-----------------------------------------------------------|-----------------------------------------------------------|
| EM42 $\Delta$ <i>gcd</i><br>pSEVA2213_ <i>xylAB</i>  | 0.02 $\pm$ 0.00                       | 0.01 $\pm$ 0.01                                                              | 0.08 $\pm$ 0.02                                    | 0.12 $\pm$ 0.00                                           | 2.58 $\pm$ 0.12                                           |
| EM42 $\Delta$ <i>gcd</i><br>pSEVA2213_ <i>xylABE</i> | 0.17 $\pm$ 0.02                       | 0.05 $\pm$ 0.01                                                              | 0.27 $\pm$ 0.08                                    | 0.12 $\pm$ 0.01                                           | 1.14 $\pm$ 0.12                                           |

4 <sup>a</sup> The specific growth rate ( $\mu$ ) was determined during exponential growth.

5 <sup>b</sup> The xylose consumption rate was determined for the initial 24 h of culture.

6 <sup>c</sup> The biomass yield on substrate (Y<sub>X/S</sub>) was determined 24 h after each culture began exponential growth.

7 <sup>d</sup> Specific activities were determined in cell free extracts prepared from cells grown on xylose to OD<sub>600</sub> = 1.0.

8

9

10

11 The xylose-proton symporter XylE from *E. coli* is a relatively small (491 amino acids)  
 12 single-gene transporter with a known tertiary structure and a well-described transport  
 13 mechanism (Davis and Henderson, 1987; Wisedchaisri et al., 2014). In the recent study by Yim  
 14 and coworkers (2016), XylE was selected as the best candidate among three tested pentose  
 15 transporters that allowed growth of *Corynebacterium glutamicum* on xylose. The same  
 16 transporter was also applied successfully in *Zymomonas mobilis* (Dunn and Rao, 2014). We  
 17 probed XylE performance in *P. putida*. The gene was PCR-amplified from the genome of *E.*  
 18 *coli* BL21(DE3) and supplied with consensus RBS to secure sufficient expression of *xylE*  
 19 cloned downstream of the *xylAB* fragment in pSEVA2213\_*xylAB*, to form the synthetic *xylABE*  
 20 operon. The *xylE* was also simultaneously amplified without a stop codon and was cloned  
 21 upstream of the *gfp* gene in the pSEVA238\_*gfp* plasmid bearing the inducible XylS/Pm  
 22 promoter to form translational fusion. The resulting construct was electroporated into *P. putida*  
 23 EM42, and fluorescence microscopy confirmed targeting of XylE-GFP protein chimera in the  
 24 cell membrane after 3MB induction (**Fig. 5**).

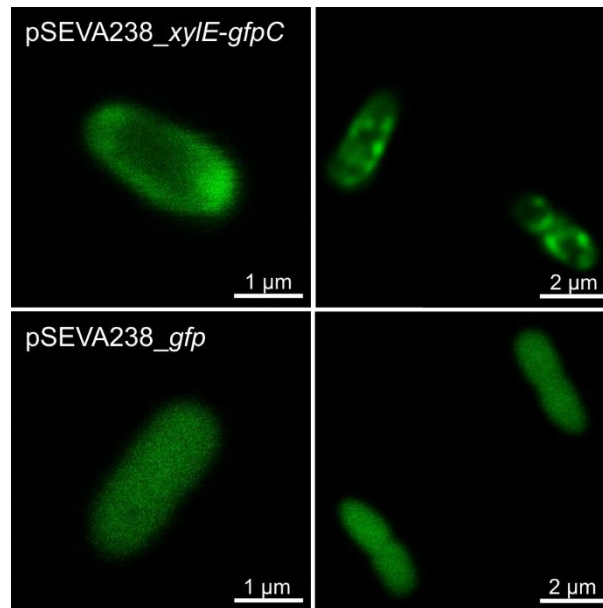

1

2 **Figure 5.** Localization of the XylE-GFP chimera in the cell membrane of *P. putida* EM42. The  
3 experiment was performed with *P. putida* EM42 pSEVA238\_xylE-gfpC cells with *xylE* and  
4 *gfp* genes cloned to form a translational fusion, and with *P. putida* EM42 pSEVA238\_gfp  
5 (negative control). Expression of the chimeric gene or *gfp* only was induced for 2.5 h with 0.5  
6 mM 3-methylbenzoate in lysogeny broth at 30°C. GFP fluorescence in cells was then  
7 monitored with a confocal microscope. Note that GFP fluorescence in cells producing the  
8 XylE-GFP chimera is predominant in membrane regions.

9

10

11 Once we confirmed correct XylE expression and localization in *P. putida*, the EM42  
12  $\Delta$ *gcd* strain was transformed with the pSEVA2213\_xylABE construct to test functioning of the  
13 whole synthetic operon. Co-expression of the exogenous transporter with xylose isomerase and  
14 xylulokinase genes improved the specific growth rate on xylose by 8-fold when compared with  
15 the recombinant without *xylE* (**Fig. 4C and Table 2**); improvement was also observed for other  
16 growth parameters (**Table 2**). The faster growth of the recombinant bearing the *xylABE*  
17 synthetic operon could not be attributed to changes in XylA or XylB activity (**Table 2**). We  
18 observed a >2-fold decrease in XylB activity when *xylE* was subcloned downstream of *xylB*  
19 and the position of the gene in operon was changed. Finally, we verified the importance of the

1 *gcd* deletion for complete xylose utilization by *P. putida* recombinants in an experiment with  
2 the EM42 pSEVA2213\_*xyLABE* strain (**Fig. 4D**). It is clear from the time course of the culture  
3 that ~50 % of all uptaken xylose was still converted non-productively to xylonate in the  
4 bacterium with functional Gcd, despite the presence of the heterologous machinery that funnels  
5 the substrate to the pentose phosphate pathway.

6 We thus demonstrate that efficient xylose metabolism can be established in the platform  
7 strain *P. putida* EM42 when two major bottlenecks – the peripheral oxidative pathway and the  
8 missing transport system – are removed. Neither of these bottlenecks was rationally engineered  
9 in previous studies of pseudomonad metabolization of xylose (Le Meur et al., 2012; Meijnen  
10 et al., 2008, 2012). The specific growth and xylose consumption rates of the *xyLABE*-bearing  
11 recombinant were lower than those we measured for *P. putida* EM42 utilizing glucose or  
12 cellobiose. Both parameters can nonetheless be improved in co-utilization experiments in  
13 which host cell growth is supported by an additional carbon source (Ha et al., 2011; Lee et al.,  
14 2016).

15

### 16 *3.5. Co-utilization of xylose with glucose and cellobiose by engineered P. putida EM42*

17 Simultaneous uptake of carbohydrates is a desirable property in any microbial cell  
18 factory used in bioprocesses for valorization of lignocellulosic substrates (Lynd et al., 2002;  
19 Stephanopoulos, 2007). Co-utilization of biomass hydrolysis products increases the efficiency  
20 of the process and prevents accumulation of non-preferred sugars, usually pentoses, in batch  
21 and continuous fermentations (Jarmander et al., 2014; Kim et al., 2015). In industrially relevant  
22 microorganisms such as *E. coli*, *S. cerevisiae* or *Z. mobilis*, however, co-utilization of  
23 lignocellulose-derived sugars is hindered by complex CCR mechanisms that prioritize glucose  
24 from other carbon sources (Görke and Stülke, 2008; Kayikci and Nielsen, 2015). These

1 mechanisms must be circumvented by mutagenesis or introduction of heterologous catabolic  
2 routes and sugar transporters (Kim et al., 2015; Lawford and Rousseau, 2002). As shown  
3 recently in yeast and *E. coli*, engineering microbes towards the use of cellobiose or other  
4 cellodextrins is a powerful alternative strategy for managing CCR (Ha et al., 2011; Vinuselvi  
5 and Lee, 2012). Glucose metabolism in *P. putida* is not as central as it is in *E. coli*, and in fact  
6 other substrates such as organic acids or amino acids are preferred to sugars (Rojo, 2010).  
7 Moreover, the isomerase pathway and the xylose transporter introduced into *P. putida* EM42  
8 are of exogenous origin and their expression is not governed by the host. We thus anticipated  
9 that our recombinant strains would have co-utilized xylose with glucose or cellobiose with no  
10 restrictions.

11 We first sought to verify simultaneous utilization of glucose and xylose in *P. putida*  
12 EM42  $\Delta gcd$  pSEVA2213\_*xylABE*. This experiment with two monomeric sugars was an  
13 essential prerequisite for co-utilization of xylose and cellobiose in engineered *P. putida*. The  
14 strain with the *gcd* deletion was used to avoid xylose oxidation to the dead-end by-product  
15 xylonate. As explained in section 3.2., this deletion is not detrimental either for glucose or for  
16 cellobiose uptake in *P. putida*, and both molecules can enter the cell with the help of ABC  
17 transporter. Equal concentrations of monosacharides ( $2 \text{ g L}^{-1}$ ) were used to better visualize the  
18 differences in glucose and xylose consumption. *Pseudomonas putida* EM42  $\Delta gcd$   
19 pSEVA2213\_*xylABE* assimilated glucose and xylose simultaneously, and no sugar was  
20 detected in culture supernatants after 24 h (**Fig. 6B**). In cultures of the negative control *P.*  
21 *putida* EM42  $\Delta gcd$  pSEVA2213 lacking the *xylABE* operon, the xylose concentration dropped  
22 by only 13% in the same time period (**Fig. 6A**). It is possible that some xylose entered the cells  
23 by non-specific transport routes. The presence of the additional carbon source significantly  
24 accelerated xylose assimilation by recombinant *P. putida* (**Fig. 6B**). On average,  $2 \text{ g L}^{-1}$  of

1 xylose were consumed during the initial 24 h of co-utilization experiments, while  $<1 \text{ g L}^{-1}$  was  
2 mineralized in cultures with pentose alone at a starting concentration of  $5 \text{ g L}^{-1}$  (**Fig. 4C**). The  
3 substrate consumption rate of xylose was nonetheless still lower than that of glucose, which  
4 caused two-phase growth of the EM42  $\Delta gcd$  pSEVA2213\_*xyLABE* strain on two sugars at the  
5 same starting concentration (**Fig. 6B**). This experiment demonstrated the ability of engineered  
6 *P. putida* to co-utilize hexose and pentose without CCR.

7

8

9

10

11

12

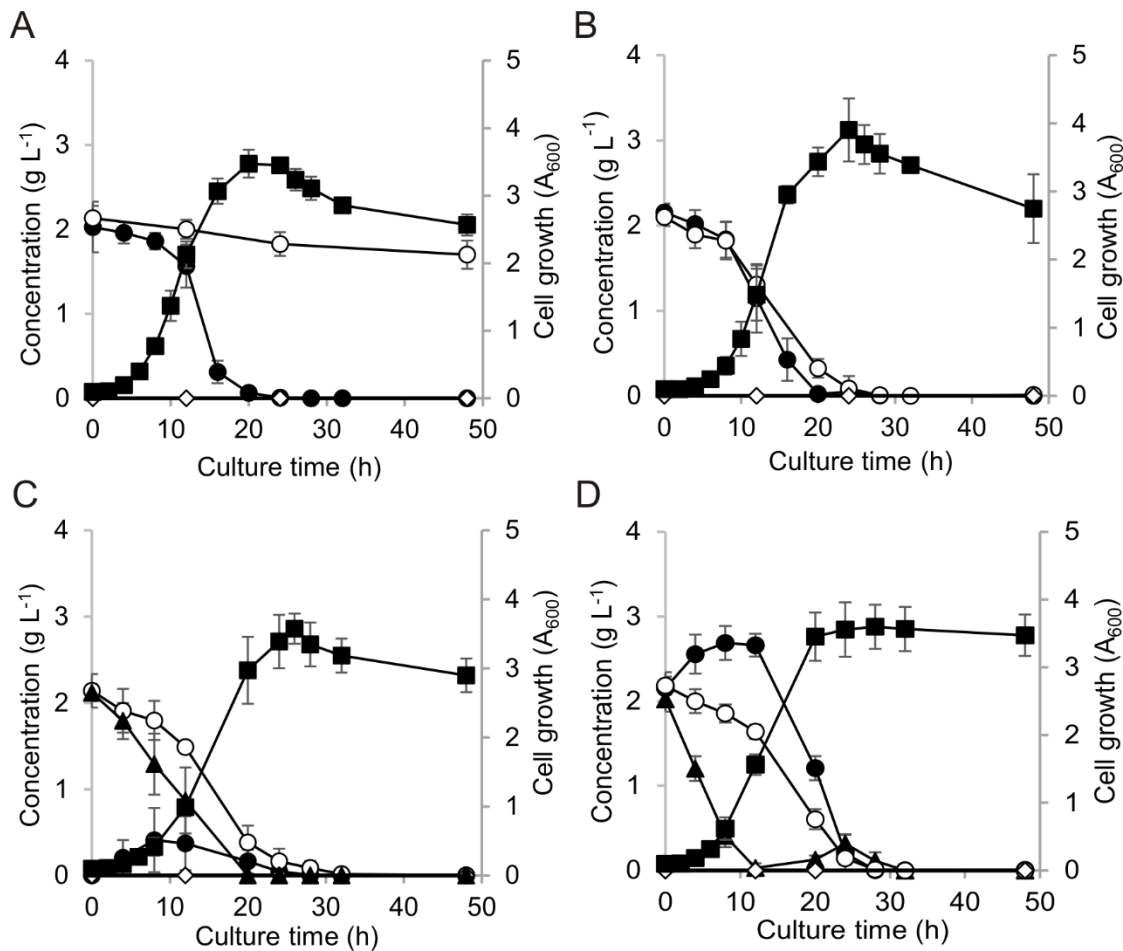

1

2 **Figure 6.** Co-utilization of D-xylose with D-glucose or D-cellobiose by *P. putida* EM42  
3 recombinants in minimal medium. Experiments were carried out in shaken flasks (30°C, 170  
4 rpm). (A) *P. putida* EM42  $\Delta$ gcd pSEVA2213 with glucose and xylose (2 g L<sup>-1</sup> each), (B) *P.*  
5 *putida* EM42  $\Delta$ gcd pSEVA2213\_xylABE with glucose and xylose (2 g L<sup>-1</sup> each), (C) *P. putida*  
6 EM42  $\Delta$ gcd bglC pSEVA2213\_xylABE with cellobiose and xylose (2 g L<sup>-1</sup> each), (D) *P. putida*  
7 EM42  $\Delta$ gcd bglC pSEVA2213\_xylABE with cellobiose, xylose, and glucose (2 g L<sup>-1</sup> each). D-  
8 glucose, filled circles (●); D-xylose, open circles (○); D-cellobiose, filled triangles (▲); D-  
9 xylonate, open diamonds (◇); cell growth, filled squares (■). Data shown as mean  $\pm$  SD from  
10 three independent experiments.

11

12

13

14

15

16

17

18

1 For the cellobiose and xylose co-utilization experiments, new metabolic modules had  
2 to be combined in a single *P. putida* cell. As the synthetic *bglC-xyLABE* operon borne on a  
3 single pSEVA2213 plasmid appeared to be unstable, we integrated the *bglC* gene directly into  
4 the *P. putida* EM42  $\Delta$ *gcd* chromosome. The gene with the pEM7 promoter and consensus RBS  
5 was subcloned into the mini-Tn5-vector pBAMD1-4, which allows for random chromosomal  
6 insertions and subsequent selection of the optimal phenotype from a broad expression  
7 landscape (Martínez-García et al., 2014a). The plasmid construct was electroporated into *P.*  
8 *putida* with a transformation efficiency of  $\sim 160,000$  CFU  $\mu\text{g}^{-1}$  of DNA. The best candidates  
9 were selected in minimal medium with cellobiose (see **Methods**). The fastest growing clone  
10 with the *bglC* insertion in gene annotated as the tyrosine recombinase subunit *xerD* (PP\_1468)  
11 was designated *P. putida* EM42  $\Delta$ *gcd bglC*. With another tyrosine recombinase XerC,  
12 functional XerD is pivotal for the process of chromosome segregation during bacterial cell  
13 division (Blakely et al., 2000). Insertion of the expression cassette with *bglC* into the *xerD* gene  
14 nonetheless did not notably affect host fitness. *Pseudomonas putida* EM42  $\Delta$ *gcd bglC* growth  
15 parameters on cellobiose were comparable with those of the *P. putida* EM42  $\Delta$ *gcd* recombinant  
16 bearing the *bglC* gene on the plasmid; substrate consumption rate was even faster (**Table 2,**  
17 **Fig. S4**). The insertion had no effect on cell viability either in rich LB medium or in minimal  
18 medium with citrate as the gluconeogenic carbon source (**Fig. S5**).

19 Hence, *P. putida* EM42  $\Delta$ *gcd bglC* was transformed with the pSEVA2213\_*xyLABE*  
20 construct, and the resulting recombinant used for co-utilization experiments. Cells were  
21 incubated in minimal medium with cellobiose and xylose at equal concentrations ( $2 \text{ g L}^{-1}$ ).  
22 Once again, both substrates were co-utilized rapidly; no residual carbohydrate was detected in  
23 supernatants after 28 h culture (**Fig. 6C**). Xylose was assimilated slower than cellobiose. We  
24 also tested performance of EM42  $\Delta$ *gcd bglC* pSEVA2213\_*xyLABE* strain in mixture of

1 cellobiose, xylose, and glucose at 2 g L<sup>-1</sup> concentration each (**Fig. 6D**). While xylose  
2 consumption remained unaffected by presence of glucose in medium, cellobiose uptake was  
3 notably accelerated. In contrast, glucose concentration in the culture supernatants increased  
4 until cellobiose was consumed and then all the hexose was co-utilized with remaining xylose.  
5 We argue that glucose, present in the medium already at the beginning of the culture, allowed  
6 faster cellobiose utilization by enhancing expression of the ABC transporter operon and  
7 adjacent *oprB* porin gene (del Castillo et al., 2007). We described in section 3.2. that the direct  
8 phosphorylation route appears to be the major uptake pathway for cellobiose, but up to 80-90%  
9 of glucose is assimilated through the oxidative route in *P. putida* KT2440 (Nikel et al., 2015).  
10 Such induced expression of the ABC transporter in *P. putida*  $\Delta gcd$  mutant could thus lead to  
11 the inverted substrate preference observed in the last co-utilization experiment.

12 Small amounts of extracellular glucose were detected in all the cultures with *P. putida*  
13 EM42  $\Delta gcd$  mutant grown on cellobiose (**Figs. 2D, 6C, 6D, and S4**). Cellobiose streamed into  
14 the cells only through the ABC transporter might cause temporal accumulation of intracellular  
15 glucose, which is released into the medium and later transported back to the cytoplasm. In  
16 contrast to many other  $\beta$ -glucosidases, BglC is not inhibited by glucose (Spiridonov and  
17 Wilson, 2001). We thus hypothesize that glucose accumulation in the EM42  $\Delta gcd$  mutant stems  
18 from an imbalance between  $\beta$ -glucosidase activity and *P. putida* glycolysis, namely its the  
19 upper part encompassing glucokinase (PP\_1011) and glucose-6-phosphate 1-dehydrogenase  
20 (PP\_1022, PP\_4042, PP\_5351). The system must accommodate all the glucose in its native form  
21 rather than its oxidized intermediates gluconate and 2-ketogluconate, which prevail in the cells  
22 with functional Gcd (Nikel et al., 2015). The imbalance could be reduced for instance by  
23 parallel modulation of expression of respective genes (Zhu et al., 2017).

24



## 1        4. Conclusions

2            Here we engineered *Pseudomonas putida* EM42, a robust platform strain derived from  
3 *P. putida* KT2440, to metabolize cellobiose and xylose, and to co-utilize these two  
4 carbohydrates. Within 24 h of culture in minimal medium, *P. putida* EM42 expressing the  
5 intracellular  $\beta$ -glucosidase BglC utilized 5 g L<sup>-1</sup> cellobiose as a sole carbon source, thus  
6 outperforming the best cellobiose-utilizing *E. coli* strain constructed to date (Vinuselvi and  
7 Lee, 2011). This result highlights the need to select cellulases with good target host  
8 compatibility. We demonstrated that *P. putida* uses its native transport routes for cellobiose  
9 uptake, as no heterologous transporter had to be implanted into our recombinants. This aligns  
10 *P. putida* KT2440 and its derivatives with several other microorganisms, such as *Clostridium*  
11 *thermocellum*, *Klebsiella oxytoca*, *Neurospora crassa*, and *Streptomyces spp.*, which possess  
12 cellodextrin transport systems and can thus manage cellobiose-rich mixtures that result from  
13 partial hydrolysis of cellulosic materials (Lynd et al., 2002; Nataf et al., 2009; Zhou et al.,  
14 2001). Metabolism of cellobiose generates more ATP in *P. putida* than when the same cells  
15 are cultured on glucose. The cellobiose-utilizing *P. putida* would thus be an even more robust  
16 host than the template strain for accommodating heterologous or engineering endogenous  
17 anabolic pathways for biosynthesis of value-added chemicals directly from the disaccharide or  
18 a co-substrate (Hara and Kondo, 2015). Finally, we identify the ability of *P. putida*, following  
19 introduction of the *xyLABE* synthetic operon, to co-utilize cellobiose or glucose with pentose,  
20 with no need for further interventions in the regulatory mechanisms of central carbon  
21 metabolism. Xylose metabolism in the EM42 chassis was established based on the conclusions  
22 of previous reports of pentose-utilizing *P. putida* strains (Le Meur et al., 2012a; Meijnen et al.,  
23 2008a), whereas the need for an exogenous transporter and *gcd* deletion for complete xylose

1 assimilation and co-utilization with glucose in our *P. putida* KT2440 derivative is demonstrated  
2 in this study.

3 Although there is indeed room for improvement and further testing of the strains  
4 constructed here, we argue that this study increases the value of *P. putida* for the  
5 biotechnological recycling of lignocellulosic feedstocks, specifically for processes that include  
6 partial hydrolysis of the input material. Using synthetic and systems biology approaches,  
7 carbon from new (hemic)cellulosic substrates -cellobiose and xylose- can be streamlined  
8 towards valuable chemicals whose production has been reported in *P. putida*, such as mcl-PHA  
9 (Poblete-Castro et al., 2013, p.), rhamnolipids (Tiso et al., 2017), terpenoids (Mi et al., 2014),  
10 coronatines (Gemperlein et al., 2017) and others (Loeschcke and Thies, 2015; Poblete-Castro  
11 et al., 2012). Given recent progress in *P. putida* KT2440 engineering for valorization of lignin  
12 (Johnson and Beckham, 2015; Linger et al., 2014), one could hypothesize that this effort could  
13 result in recombinant bacterial workhorses capable of simultaneous biotechnological  
14 processing of and adding value to all three lignocellulose-derived fractions.

15

## 16 **Acknowledgements**

17 We would like to thank prof. Edward A. Bayer for providing us with pET21a\_ *bglC* plasmid,  
18 to Dr. Esteban Martínez-García for *P. putida* EM42 strain, and to Dr. Alberto Sánchez-Pascuala  
19 for pEMG\_ *gtsABCD* and pEMG\_ *gcd* plasmids and corresponding oligonucleotide primers.  
20 The project has received funding from the EU's Horizon 2020 research and innovation  
21 programme under the Marie Skłodowska-Curie grant agreement No 704410 (FUTURE).

## 22 **Appendix A. Supplementary material**

23 Dataset to this manuscript is available at <https://data.mendeley.com/datasets> with DOI:  
24 10.17632/j7ypmvfnvt.1

## 5. References

- 1  
2 Abril, M.A., Michan, C., Timmis, K.N., Ramos, J.L., 1989. Regulator and enzyme  
3 specificities of the TOL plasmid-encoded upper pathway for degradation of aromatic  
4 hydrocarbons and expansion of the substrate range of the pathway. *J. Bacteriol.* 171,  
5 6782–6790.
- 6 Aparicio, T., de Lorenzo, V., Martínez-García, E., 2017. CRISPR/Cas9-based  
7 counterselection boosts recombineering efficiency in *Pseudomonas putida*.  
8 *Biotechnol. J.* <https://doi.org/10.1002/biot.201700161>
- 9 Aparicio, T., de Lorenzo, V., Martínez-García, E., 2015. Broadening the SEVA plasmid  
10 repertoire to facilitate genomic editing of Gram-negative bacteria, in: *Hydrocarbon*  
11 *and Lipid Microbiology Protocols*, Springer Protocols Handbooks. Springer, Berlin,  
12 Heidelberg, pp. 9–27.
- 13 Bagdasarian, M., Lurz, R., Rückert, B., Franklin, F.C., Bagdasarian, M.M., Frey, J., Timmis,  
14 K.N., 1981. Specific-purpose plasmid cloning vectors. II. Broad host range, high copy  
15 number, RSF1010-derived vectors, and a host-vector system for gene cloning in  
16 *Pseudomonas*. *Gene* 16, 237–247.
- 17 Benedetti, I., de Lorenzo, V., Nickel, P.I., 2016. Genetic programming of catalytic  
18 *Pseudomonas putida* biofilms for boosting biodegradation of haloalkanes. *Metab.*  
19 *Eng.* 33, 109–118.
- 20 Blakely, G.W., Davidson, A.O., Sherratt, D.J., 2000. Sequential strand exchange by XerC  
21 and XerD during site-specific recombination at dif. *J. Biol. Chem.* 275, 9930–9936.
- 22 Boyer, H.W., Roulland-Dussoix, D., 1969. A complementation analysis of the restriction and  
23 modification of DNA in *Escherichia coli*. *J. Mol. Biol.* 41, 459–472.
- 24 Bradford, M.M., 1976. A rapid and sensitive method for the quantitation of microgram  
25 quantities of protein utilizing the principle of protein-dye binding. *Anal. Biochem.* 72,  
26 248–254.
- 27 Calero, P., Jensen, S.I., Bojanovič, K., Lennen, R.M., Koza, A., Nielsen, A.T., 2017.  
28 Genome-wide identification of tolerance mechanisms toward *p*-coumaric acid in  
29 *Pseudomonas putida*. *Biotechnol. Bioeng.* <https://doi.org/10.1002/bit.26495>
- 30 Chen, P., Fu, X., Ng, T.B., Ye, X.-Y., 2011. Expression of a secretory  $\beta$ -glucosidase from  
31 *Trichoderma reesei* in *Pichia pastoris* and its characterization. *Biotechnol. Lett.* 33,  
32 2475–2479.
- 33 Chen, R., 2015. A paradigm shift in biomass technology from complete to partial cellulose  
34 hydrolysis: lessons learned from nature. *Bioengineered* 6, 69–72.
- 35 Davis, E.O., Henderson, P.J., 1987. The cloning and DNA sequence of the gene *xylE* for  
36 xylose-proton symport in *Escherichia coli* K12. *J. Biol. Chem.* 262, 13928–13932.
- 37 del Castillo, T., Ramos, J.L., Rodríguez-Herva, J.J., Fuhrer, T., Sauer, U., Duque, E., 2007.  
38 Convergent peripheral pathways catalyze initial glucose catabolism in *Pseudomonas*  
39 *putida*: genomic and flux analysis. *J. Bacteriol.* 189, 5142–5152.
- 40 Desai, S.H., Rabinovitch-Deere, C.A., Tashiro, Y., Atsumi, S., 2014. Isobutanol production  
41 from cellobiose in *Escherichia coli*. *Appl. Microbiol. Biotechnol.* 98, 3727–3736.
- 42 Dos Santos, V.A.P.M., Heim, S., Moore, E.R.B., Strätz, M., Timmis, K.N., 2004. Insights  
43 into the genomic basis of niche specificity of *Pseudomonas putida* KT2440. *Environ.*  
44 *Microbiol.* 6, 1264–1286.
- 45 Dunn, K.L., Rao, C.V., 2014. Expression of a xylose-specific transporter improves ethanol  
46 production by metabolically engineered *Zymomonas mobilis*. *Appl. Microbiol.*  
47 *Biotechnol.* 98, 6897–6905.

- 1 Ebert, B.E., Kurth, F., Grund, M., Blank, L.M., Schmid, A., 2011. Response of *Pseudomonas*  
2 *putida* KT2440 to increased NADH and ATP demand. *Appl. Environ. Microbiol.* 77,  
3 6597–6605.
- 4 Eliasson, A., Boles, E., Johansson, B., Osterberg, M., Thevelein, J.M., Spencer-Martins, I.,  
5 Juhnke, H., Hahn-Hägerdal, B., 2000. Xylulose fermentation by mutant and wild-type  
6 strains of *Zygosaccharomyces* and *Saccharomyces cerevisiae*. *Appl. Microbiol.*  
7 *Biotechnol.* 53, 376–382.
- 8 Elmore, J.R., Furches, A., Wolff, G.N., Gorday, K., Guss, A.M., 2017. Development of a  
9 high efficiency integration system and promoter library for rapid modification of  
10 *Pseudomonas putida* KT2440. *Metab. Eng. Commun.* 5, 1–8.
- 11 Fan, L.-H., Zhang, Z.-J., Yu, X.-Y., Xue, Y.-X., Tan, T.-W., 2012. Self-surface assembly of  
12 cellulosomes with two miniscaffoldins on *Saccharomyces cerevisiae* for cellulosic  
13 ethanol production. *Proc. Natl. Acad. Sci. U. S. A.* 109, 13260–13265.
- 14 Gemperlein, K., Hoffmann, M., Huo, L., Pilak, P., Petzke, L., Müller, R., Wenzel, S.C., 2017.  
15 Synthetic biology approaches to establish a heterologous production system for  
16 coronatines. *Metab. Eng.* 44, 213–222.
- 17 Görke, B., Stülke, J., 2008. Carbon catabolite repression in bacteria: many ways to make the  
18 most out of nutrients. *Nat. Rev. Microbiol.* 6, 613–624.
- 19 Grant, S.G., Jessee, J., Bloom, F.R., Hanahan, D., 1990. Differential plasmid rescue from  
20 transgenic mouse DNAs into *Escherichia coli* methylation-restriction mutants. *Proc.*  
21 *Natl. Acad. Sci. U. S. A.* 87, 4645–4649.
- 22 Guarnieri, M.T., Ann Franden, M., Johnson, C.W., Beckham, G.T., 2017. Conversion and  
23 assimilation of furfural and 5-(hydroxymethyl)furfural by *Pseudomonas putida*  
24 KT2440. *Metab. Eng. Commun.* 4, 22–28.
- 25 Ha, S.-J., Galazka, J.M., Kim, S.R., Choi, J.-H., Yang, X., Seo, J.-H., Glass, N.L., Cate,  
26 J.H.D., Jin, Y.-S., 2011. Engineered *Saccharomyces cerevisiae* capable of  
27 simultaneous cellobiose and xylose fermentation. *Proc. Natl. Acad. Sci. U. S. A.* 108,  
28 504–509.
- 29 Hara, K.Y., Kondo, A., 2015. ATP regulation in bioproduction. *Microb. Cell Factories* 14,  
30 198.
- 31 Henriksson, G., Johansson, G., Pettersson, G., 2000. A critical review of cellobiose  
32 dehydrogenases. *J. Biotechnol.* 78, 93–113.
- 33 Herrero, M., de Lorenzo, V., Timmis, K.N., 1990. Transposon vectors containing non-  
34 antibiotic resistance selection markers for cloning and stable chromosomal insertion  
35 of foreign genes in gram-negative bacteria. *J. Bacteriol.* 172, 6557–6567.
- 36 Horton, R.M., Cai, Z.L., Ho, S.N., Pease, L.R., 1990. Gene splicing by overlap extension:  
37 tailor-made genes using the polymerase chain reaction. *BioTechniques* 8, 528–535.
- 38 Jarmander, J., Hallström, B.M., Larsson, G., 2014. Simultaneous uptake of lignocellulose-  
39 based monosaccharides by *Escherichia coli*. *Biotechnol. Bioeng.* 111, 1108–1115.
- 40 Jiménez, J.I., Miñambres, B., García, J.L., Díaz, E., 2002. Genomic analysis of the aromatic  
41 catabolic pathways from *Pseudomonas putida* KT2440. *Environ. Microbiol.* 4, 824–  
42 841.
- 43 Johnson, C.W., Beckham, G.T., 2015. Aromatic catabolic pathway selection for optimal  
44 production of pyruvate and lactate from lignin. *Metab. Eng.* 28, 240–247.
- 45 Kajikawa, H., Masaki, S., 1999. Cellobiose transport by mixed ruminal bacteria from a Cow.  
46 *Appl. Environ. Microbiol.* 65, 2565–2569.
- 47 Kawaguchi, H., Hasunuma, T., Ogino, C., Kondo, A., 2016. Bioprocessing of bio-based  
48 chemicals produced from lignocellulosic feedstocks. *Curr. Opin. Biotechnol.* 42, 30–  
49 39.

- 1 Kayikci, Ö., Nielsen, J., 2015. Glucose repression in *Saccharomyces cerevisiae*. FEMS Yeast  
2 Res. 15. <https://doi.org/10.1093/femsyr/fov068>
- 3 Kessler, B., Herrero, M., Timmis, K.N., de Lorenzo, V., 1994. Genetic evidence that the  
4 XylS regulator of the *Pseudomonas* TOL meta operon controls the Pm promoter  
5 through weak DNA-protein interactions. J. Bacteriol. 176, 3171–3176.
- 6 Kim, S.M., Choi, B.Y., Ryu, Y.S., Jung, S.H., Park, J.M., Kim, G.-H., Lee, S.K., 2015.  
7 Simultaneous utilization of glucose and xylose via novel mechanisms in engineered  
8 *Escherichia coli*. Metab. Eng. 30, 141–148.
- 9 Lai, B., Yu, S., Bernhardt, P.V., Rabaey, K., Viridis, B., Krömer, J.O., 2016. Anoxic  
10 metabolism and biochemical production in *Pseudomonas putida* F1 driven by a  
11 bioelectrochemical system. Biotechnol. Biofuels 9, 39.
- 12 Lane, S., Zhang, S., Wei, N., Rao, C., Jin, Y.-S., 2015. Development and physiological  
13 characterization of cellobiose-consuming *Yarrowia lipolytica*. Biotechnol. Bioeng.  
14 112, 1012–1022.
- 15 Lawford, H.G., Rousseau, J.D., 2002. Performance testing of *Zymomonas mobilis*  
16 metabolically engineered for cofermentation of glucose, xylose, and arabinose. Appl.  
17 Biochem. Biotechnol. 98–100, 429–448.
- 18 Le Meur, S., Zinn, M., Egli, T., Thöny-Meyer, L., Ren, Q., 2012. Production of medium-  
19 chain-length polyhydroxyalkanoates by sequential feeding of xylose and octanoic acid  
20 in engineered *Pseudomonas putida* KT2440. BMC Biotechnol. 12, 53.
- 21 Lee, J., Saddler, J.N., Um, Y., Woo, H.M., 2016. Adaptive evolution and metabolic  
22 engineering of a cellobiose- and xylose- negative *Corynebacterium glutamicum* that  
23 co-utilizes cellobiose and xylose. Microb. Cell Factories 15, 20.
- 24 Li, X., Chomvong, K., Yu, V.Y., Liang, J.M., Lin, Y., Cate, J.H.D., 2015. Cellobionic acid  
25 utilization: from *Neurospora crassa* to *Saccharomyces cerevisiae*. Biotechnol.  
26 Biofuels 8, 120.
- 27 Lieder, S., Nikel, P.I., de Lorenzo, V., Takors, R., 2015. Genome reduction boosts  
28 heterologous gene expression in *Pseudomonas putida*. Microb. Cell Factories 14, 23.
- 29 Lien, O.G., 1959. Determination of gluconolactone, galactonolactone, and their free acids by  
30 hydroxamate method. Anal. Chem. 31, 1363–1366.
- 31 Linger, J.G., Vardon, D.R., Guarnieri, M.T., Karp, E.M., Hunsinger, G.B., Franden, M.A.,  
32 Johnson, C.W., Chupka, G., Strathmann, T.J., Pienkos, P.T., Beckham, G.T., 2014.  
33 Lignin valorization through integrated biological funneling and chemical catalysis.  
34 Proc. Natl. Acad. Sci. U. S. A. 111, 12013–12018.
- 35 Liu, Y., Rainey, P.B., Zhang, X.-X., 2015. Molecular mechanisms of xylose utilization by  
36 *Pseudomonas fluorescens*: overlapping genetic responses to xylose, xylulose, ribose  
37 and mannitol. Mol. Microbiol. 98, 553–570.
- 38 Loeschke, A., Thies, S., 2015. *Pseudomonas putida*-a versatile host for the production of  
39 natural products. Appl. Microbiol. Biotechnol. 99, 6197–6214.
- 40 Lundin, A., Thore, A., 1975. Comparison of methods for extraction of bacterial adenine  
41 nucleotides determined by firefly assay. Appl. Microbiol. 30, 713–721.
- 42 Lynd, L.R., Weimer, P.J., van Zyl, W.H., Pretorius, I.S., 2002. Microbial cellulose  
43 utilization: fundamentals and biotechnology. Microbiol. Mol. Biol. Rev. MMBR 66,  
44 506–577.
- 45 Martínez-García, E., de Lorenzo, V., 2012. Transposon-based and plasmid-based genetic  
46 tools for editing genomes of gram-negative bacteria. Methods Mol. Biol. Clifton NJ  
47 813, 267–283.

- 1 Martínez-García, E., Aparicio, T., de Lorenzo, V., Nikel, P.I., 2014a. New transposon tools  
2 tailored for metabolic engineering of gram-negative microbial cell factories. *Front.*  
3 *Bioeng. Biotechnol.* 2, 46.
- 4 Martínez-García, E., Nikel, P.I., Aparicio, T., de Lorenzo, V., 2014b. *Pseudomonas* 2.0:  
5 genetic upgrading of *P. putida* KT2440 as an enhanced host for heterologous gene  
6 expression. *Microb. Cell Factories* 13, 159.
- 7 Martínez-García, E., de Lorenzo, V., 2017. Molecular tools and emerging strategies for deep  
8 genetic/genomic refactoring of *Pseudomonas*. *Curr. Opin. Biotechnol.* 47, 120–132.
- 9 Meijnen, J.-P., de Winde, J.H., Ruijssenaars, H.J., 2008. Engineering *Pseudomonas putida*  
10 S12 for efficient utilization of D-xylose and L-arabinose. *Appl. Environ. Microbiol.*  
11 74, 5031–5037.
- 12 Meijnen, J.-P., de Winde, J.H., Ruijssenaars, H.J., 2012. Metabolic and regulatory  
13 rearrangements underlying efficient D-xylose utilization in engineered *Pseudomonas*  
14 *putida* S12. *J. Biol. Chem.* 287, 14606–14614.
- 15 Mi, J., Becher, D., Lubuta, P., Dany, S., Tusch, K., Schewe, H., Buchhaupt, M., Schrader, J.,  
16 2014. *De novo* production of the monoterpenoid geranic acid by metabolically  
17 engineered *Pseudomonas putida*. *Microb. Cell Factories* 13, 170.
- 18 Mosier, N., Wyman, C., Dale, B., Elander, R., Lee, Y.Y., Holtzapple, M., Ladisch, M., 2005.  
19 Features of promising technologies for pretreatment of lignocellulosic biomass.  
20 *Bioresour. Technol.* 96, 673–686.
- 21 Muñoz-Gutiérrez, I., Moss-Acosta, C., Trujillo-Martinez, B., Gosset, G., Martinez, A., 2014.  
22 Ag43-mediated display of a thermostable  $\beta$ -glucosidase in *Escherichia coli* and its use  
23 for simultaneous saccharification and fermentation at high temperatures. *Microb. Cell*  
24 *Factories* 13, 106.
- 25 Nataf, Y., Yaron, S., Stahl, F., Lamed, R., Bayer, E.A., Scheper, T.-H., Sonenshein, A.L.,  
26 Shoham, Y., 2009. Cellodextrin and laminaribiose ABC transporters in *Clostridium*  
27 *thermocellum*. *J. Bacteriol.* 191, 203–209.
- 28 Nikel, P.I., Chavarría, M., Fuhrer, T., Sauer, U., de Lorenzo, V., 2015. *Pseudomonas putida*  
29 KT2440 strain metabolizes glucose through a cycle formed by enzymes of the Entner-  
30 Doudoroff, Embden-Meyerhof-Parnas, and pentose phosphate pathways. *J. Biol.*  
31 *Chem.* 290, 25920–25932.
- 32 Nikel, P.I., de Lorenzo, V., 2014. Robustness of *Pseudomonas putida* KT2440 as a host for  
33 ethanol biosynthesis. *New Biotechnol.* 31, 562–571.
- 34 Nikel, P.I., de Lorenzo, V., 2013. Engineering an anaerobic metabolic regime in  
35 *Pseudomonas putida* KT2440 for the anoxic biodegradation of 1,3-dichloroprop-1-  
36 ene. *Metab. Eng.* 15, 98–112.
- 37 Nikel, P.I., Martínez-García, E., de Lorenzo, V., 2014. Biotechnological domestication of  
38 pseudomonads using synthetic biology. *Nat. Rev. Microbiol.* 12, 368–379.
- 39 Nogales, J., Gudmundsson, S., Duque, E., Ramos, J.L., Palsson, B.O., 2017. Expanding the  
40 computable reactome in *Pseudomonas putida* reveals metabolic cycles providing  
41 robustness. bioRxiv 139121. <https://doi.org/10.1101/139121>
- 42 Parisutham, V., Chandran, S.-P., Mukhopadhyay, A., Lee, S.K., Keasling, J.D., 2017.  
43 Intracellular cellobiose metabolism and its applications in lignocellulose-based  
44 biorefineries. *Bioresour. Technol.* 239, 496–506.
- 45 Poblete-Castro, I., Becker, J., Dohnt, K., dos Santos, V.M., Wittmann, C., 2012. Industrial  
46 biotechnology of *Pseudomonas putida* and related species. *Appl. Microbiol.*  
47 *Biotechnol.* 93, 2279–2290.

- 1 Poblete-Castro, I., Binger, D., Rodrigues, A., Becker, J., Martins Dos Santos, V.A.P.,  
2 Wittmann, C., 2013. *In-silico*-driven metabolic engineering of *Pseudomonas putida*  
3 for enhanced production of poly-hydroxyalkanoates. *Metab. Eng.* 15, 113–123.
- 4 Puchalka, J., Oberhardt, M.A., Godinho, M., Bielecka, A., Regenhardt, D., Timmis, K.N.,  
5 Papin, J.A., Martins dos Santos, V.A.P., 2008. Genome-scale reconstruction and  
6 analysis of the *Pseudomonas putida* KT2440 metabolic network facilitates  
7 applications in biotechnology. *PLoS Comput. Biol.* 4, e1000210.
- 8 Rojo, F., 2010. Carbon catabolite repression in *Pseudomonas* : optimizing metabolic  
9 versatility and interactions with the environment. *FEMS Microbiol. Rev.* 34, 658–  
10 684.
- 11 Rutter, C., Mao, Z., Chen, R., 2013. Periplasmic expression of a *Saccharophagus*  
12 cellodextrinase enables *E. coli* to ferment cellodextrin. *Appl. Microbiol. Biotechnol.*  
13 97, 8129–8138.
- 14 Sambrook, J., Russell, D.W., 2001. *Molecular Cloning: A Laboratory Manual*. CSHL Press.
- 15 Shin, H.-D., Wu, J., Chen, R., 2014. Comparative engineering of *Escherichia coli* for  
16 cellobiose utilization: Hydrolysis versus phosphorolysis. *Metab. Eng.* 24, 9–17.
- 17 Silva-Rocha, R., Martínez-García, E., Calles, B., Chavarría, M., Arce-Rodríguez, A., de Las  
18 Heras, A., Páez-Espino, A.D., Durante-Rodríguez, G., Kim, J., Nikel, P.I., Platero, R.,  
19 de Lorenzo, V., 2013. The Standard European Vector Architecture (SEVA): a  
20 coherent platform for the analysis and deployment of complex prokaryotic  
21 phenotypes. *Nucleic Acids Res.* 41, D666–675.
- 22 Singhanian, R.R., Patel, A.K., Sukumaran, R.K., Larroche, C., Pandey, A., 2013. Role and  
23 significance of beta-glucosidases in the hydrolysis of cellulose for bioethanol  
24 production. *Bioresour. Technol.* 127, 500–507.  
25 <https://doi.org/10.1016/j.biortech.2012.09.012>
- 26 Smith, C.M., Williamson, J.R., 1971. Inhibition of citrate synthase by succinyl-CoA and  
27 other metabolites. *FEBS Lett.* 18, 35–38.
- 28 Spiridonov, N.A., Wilson, D.B., 2001. Cloning and biochemical characterization of BglC, a  
29 beta-glucosidase from the cellulolytic actinomycete *Thermobifida fusca*. *Curr.*  
30 *Microbiol.* 42, 295–301.
- 31 Stephanopoulos, G., 2007. Challenges in engineering microbes for biofuels production.  
32 *Science* 315, 801–804.
- 33 Taha, M., Foda, M., Shahsavari, E., Aburto-Medina, A., Adetutu, E., Ball, A., 2016.  
34 Commercial feasibility of lignocellulose biodegradation: possibilities and challenges.  
35 *Curr. Opin. Biotechnol.* 38, 190–197.
- 36 Teugjas, H., Väljamäe, P., 2013. Product inhibition of cellulases studied with <sup>14</sup>C-labeled  
37 cellulose substrates. *Biotechnol. Biofuels* 6, 104.
- 38 Thurston, B., Dawson, K.A., Strobel, H.J., 1993. Cellobiose versus glucose utilization by the  
39 ruminal bacterium *Ruminococcus albus*. *Appl. Environ. Microbiol.* 59, 2631–2637.
- 40 Tiso, T., Zauter, R., Tulke, H., Leuchtle, B., Li, W.-J., Behrens, B., Wittgens, A., Rosenau,  
41 F., Hayen, H., Blank, L.M., 2017. Designer rhamnolipids by reduction of congener  
42 diversity: production and characterization. *Microb. Cell Factories* 16, 225.
- 43 Tozakidis, I.E.P., Brossette, T., Lenz, F., Maas, R.M., Jose, J., 2016. Proof of concept for the  
44 simplified breakdown of cellulose by combining *Pseudomonas putida* strains with  
45 surface displayed thermophilic endocellulase, exocellulase and  $\beta$ -glucosidase. *Microb.*  
46 *Cell Factories* 15, 103.
- 47 Vinuselvi, P., Lee, S.K., 2011. Engineering *Escherichia coli* for efficient cellobiose  
48 utilization. *Appl. Microbiol. Biotechnol.* 92, 125–132.

- 1 Vinuselvi, P., Lee, S.K., 2012. Engineered *Escherichia coli* capable of co-utilization of  
2 cellobiose and xylose. *Enzyme Microb. Technol.* 50, 1–4.
- 3 Wisedchaisri, G., Park, M.-S., Iadanza, M.G., Zheng, H., Gonen, T., 2014. Proton-coupled  
4 sugar transport in the prototypical major facilitator superfamily protein XyleE. *Nat.*  
5 *Commun.* 5, 4521.
- 6 Yang, M., Luoh, S.M., Goddard, A., Reilly, D., Henzel, W., Bass, S., 1996. The *bglX* gene  
7 located at 47.8 min on the *Escherichia coli* chromosome encodes a periplasmic beta-  
8 glucosidase. *Microbiol. Read. Engl.* 142 ( Pt 7), 1659–1665.
- 9 Yim, S.S., Choi, J.W., Lee, S.H., Jeong, K.J., 2016. Modular optimization of a hemicellulose-  
10 utilizing pathway in *Corynebacterium glutamicum* for consolidated bioprocessing of  
11 hemicellulosic biomass. *ACS Synth. Biol.* 5, 334–343.
- 12 Zhou, S., Davis, F.C., Ingram, L.O., 2001. Gene integration and expression and extracellular  
13 secretion of *Erwinia chrysanthemi* endoglucanase CelY (*celY*) and CelZ (*celZ*) in  
14 ethanologenic *Klebsiella oxytoca* P2. *Appl. Environ. Microbiol.* 67, 6–14.
- 15 Zhu, X., Zhao, D., Qiu, H., Fan, F., Man, S., Bi, C., Zhang, X., 2017. The CRISPR/Cas9-  
16 facilitated multiplex pathway optimization (CFPO) technique and its application to  
17 improve the *Escherichia coli* xylose utilization pathway. *Metab. Eng.* 43, 37–45.
- 18 Zobel, S., Benedetti, I., Eisenbach, L., de Lorenzo, V., Wierckx, N., Blank, L.M., 2015. Tn7-  
19 based device for calibrated heterologous gene expression in *Pseudomonas putida*.  
20 *ACS Synth. Biol.* 4, 1341–1351.
- 21
